# Supplementary material for: Ranolazine Inhibits Pyroptosis via Regulation of miR-135b in the Treatment of Diabetic Cardiac Fibrosis
Source: PubMed Central journal article supplement (PMC8826643; doi:10.3389/fmolb.2022.806966), 2022-01-26

**Figure1A**

|           | <b>Sample</b> | <b>Blank</b> | <b>Standard</b> |                                |  |  |
|-----------|---------------|--------------|-----------------|--------------------------------|--|--|
| 0weeks-1  | 0.129         | 0.05         | 0.250666667     |                                |  |  |
| 0weeks-2  | 0.117         |              |                 |                                |  |  |
| 0weeks-3  | 0.129         |              |                 |                                |  |  |
| 0weeks-4  | 0.139         |              |                 |                                |  |  |
| 0weeks-5  | 0.139         |              |                 | Standard concentration=5.17 mM |  |  |
| 0weeks-6  | 0.124         |              |                 |                                |  |  |
| 0weeks-7  | 0.123         |              |                 |                                |  |  |
| 0weeks-8  | 0.107         |              |                 |                                |  |  |
| 0weeks-9  | 0.114         |              |                 |                                |  |  |
| 0weeks-10 | 0.119         |              |                 |                                |  |  |

|           | <b>Sample</b> | <b>Blank</b> | <b>Standard</b> |                                |  |  |
|-----------|---------------|--------------|-----------------|--------------------------------|--|--|
| 8weeks-1  | 0.187         | 0.050333333  | 0.236           |                                |  |  |
| 8weeks-2  | 0.194         |              |                 |                                |  |  |
| 8weeks-3  | 0.2           |              |                 |                                |  |  |
| 8weeks-4  | 0.206         |              |                 |                                |  |  |
| 8weeks-5  | 0.201         |              |                 | Standard concentration=5.17 mM |  |  |
| 8weeks-6  | 0.193         |              |                 |                                |  |  |
| 8weeks-7  | 0.187         |              |                 |                                |  |  |
| 8weeks-8  | 0.189         |              |                 |                                |  |  |
| 8weeks-9  | 0.185         |              |                 |                                |  |  |
| 8weeks-10 | 0.192         |              |                 |                                |  |  |

**Figure1B**

|           | <b>Sample</b> | <b>Blank</b> | <b>Standard</b> |                                |  |  |
|-----------|---------------|--------------|-----------------|--------------------------------|--|--|
| 0weeks-1  | 0.083         | 0.047        | 0.123           |                                |  |  |
| 0weeks-2  | 0.072         |              |                 |                                |  |  |
| 0weeks-3  | 0.08          |              |                 |                                |  |  |
| 0weeks-4  | 0.078         |              |                 |                                |  |  |
| 0weeks-5  | 0.081         |              |                 |                                |  |  |
| 0weeks-6  | 0.079         |              |                 | Standard concentration=2.26 mM |  |  |
| 0weeks-7  | 0.088         |              |                 |                                |  |  |
| 0weeks-8  | 0.069         |              |                 |                                |  |  |
| 0weeks-9  | 0.074         |              |                 |                                |  |  |
| 0weeks-10 | 0.075         |              |                 |                                |  |  |

|          | <b>Sample</b> | <b>Blank</b> | <b>Standard</b> |                                |  |  |
|----------|---------------|--------------|-----------------|--------------------------------|--|--|
| 8week-1  | 0.174         | 0.046        | 0.2             |                                |  |  |
| 8week-2  | 0.162         |              |                 |                                |  |  |
| 8week-3  | 0.161         |              |                 |                                |  |  |
| 8week-4  | 0.154         |              |                 |                                |  |  |
| 8week-5  | 0.155         |              |                 |                                |  |  |
| 8week-6  | 0.153         |              |                 | Standard concentration=2.26 mM |  |  |
| 8week-7  | 0.156         |              |                 |                                |  |  |
| 8week-8  | 0.148         |              |                 |                                |  |  |
| 8week-9  | 0.16          |              |                 |                                |  |  |
| 8week-10 | 0.167         |              |                 |                                |  |  |

**Figure1C**

|           | <b>Sample1</b> | <b>Sample2</b> | <b>Blank1</b>                 | <b>Blank2</b> | <b>Standard1</b> | <b>Standard2</b> |  |
|-----------|----------------|----------------|-------------------------------|---------------|------------------|------------------|--|
| 0weeks-1  | 0.079          | 0.137          | 0.048                         | 0.051         | 0.062            | 0.312333333      |  |
| 0weeks-2  | 0.076          | 0.136          |                               |               |                  |                  |  |
| 0weeks-3  | 0.078          | 0.149          |                               |               |                  |                  |  |
| 0weeks-4  | 0.068          | 0.133          |                               |               |                  |                  |  |
| 0weeks-5  | 0.066          | 0.15           |                               |               |                  |                  |  |
| 0weeks-6  | 0.076          | 0.132          |                               |               |                  |                  |  |
| 0weeks-7  | 0.082          | 0.148          | Standard concentration=2.55mM |               |                  |                  |  |
| 0weeks-8  | 0.081          | 0.154          |                               |               |                  |                  |  |
| 0weeks-9  | 0.073          | 0.166          |                               |               |                  |                  |  |
| 0weeks-10 | 0.065          | 0.149          |                               |               |                  |                  |  |

|           | <b>Sample1</b> | <b>Sample2</b> | <b>Blank1</b>                 | <b>Blank2</b> | <b>Standard1</b> | <b>Standard2</b> |  |
|-----------|----------------|----------------|-------------------------------|---------------|------------------|------------------|--|
| 8weeks-1  | 0.058          | 0.157          | 0.044333333                   | 0.056         | 0.065666667      | 0.265            |  |
| 8weeks-2  | 0.059          | 0.142          |                               |               |                  |                  |  |
| 8weeks-3  | 0.058          | 0.152          |                               |               |                  |                  |  |
| 8weeks-4  | 0.058          | 0.141          |                               |               |                  |                  |  |
| 8weeks-5  | 0.052          | 0.158          | Standard concentration=2.55mM |               |                  |                  |  |
| 8weeks-6  | 0.055          | 0.153          |                               |               |                  |                  |  |
| 8weeks-7  | 0.054          | 0.169          |                               |               |                  |                  |  |
| 8weeks-8  | 0.052          | 0.159          |                               |               |                  |                  |  |
| 8weeks-9  | 0.057          | 0.154          |                               |               |                  |                  |  |
| 8weeks-10 | 0.059          | 0.139          |                               |               |                  |                  |  |



**Figure1D**

|          | <b>Sample1</b> | <b>Sample2</b> | <b>Blank1</b>                 | <b>Blank2</b> | <b>Standard1</b> | <b>Standard2</b> |  |
|----------|----------------|----------------|-------------------------------|---------------|------------------|------------------|--|
| 0week-1  | 0.057          | 0.123          | 0.047333333                   | 0.052         | 0.057666667      | 0.116            |  |
| 0week-2  | 0.062          | 0.125          |                               |               |                  |                  |  |
| 0week-3  | 0.06           | 0.131          |                               |               |                  |                  |  |
| 0week-4  | 0.055          | 0.122          |                               |               |                  |                  |  |
| 0week-5  | 0.054          | 0.141          |                               |               |                  |                  |  |
| 0week-6  | 0.062          | 0.14           |                               |               |                  |                  |  |
| 0week-7  | 0.066          | 0.137          | Standard concentration=1.1 mM |               |                  |                  |  |
| 0week-8  | 0.063          | 0.136          |                               |               |                  |                  |  |
| 0week-9  | 0.066          | 0.143          |                               |               |                  |                  |  |
| 0week-10 | 0.052          | 0.141          |                               |               |                  |                  |  |

  

|           | <b>Sample1</b> | <b>Sample2</b> | <b>Blank1</b>                 | <b>Blank2</b> | <b>Standard1</b> | <b>Standard2</b> |  |
|-----------|----------------|----------------|-------------------------------|---------------|------------------|------------------|--|
| 8weeks-1  | 0.052          | 0.157          | 0.041666667                   | 0.049         | 0.062333333      | 0.203333333      |  |
| 8weeks-2  | 0.05           | 0.158          |                               |               |                  |                  |  |
| 8weeks-3  | 0.055          | 0.161          |                               |               |                  |                  |  |
| 8weeks-4  | 0.053          | 0.172          |                               |               |                  |                  |  |
| 8weeks-5  | 0.059          | 0.149          |                               |               |                  |                  |  |
| 8weeks-6  | 0.058          | 0.162          | Standard concentration=1.1 mM |               |                  |                  |  |
| 8weeks-7  | 0.052          | 0.163          |                               |               |                  |                  |  |
| 8weeks-8  | 0.054          | 0.167          |                               |               |                  |                  |  |
| 8weeks-9  | 0.057          | 0.161          |                               |               |                  |                  |  |
| 8weeks-10 | 0.058          | 0.163          |                               |               |                  |                  |  |

Figure1E

| Fasting blood glucose data |        |        |        |         |         |         |
|----------------------------|--------|--------|--------|---------|---------|---------|
|                            | 0weeks | 4weeks | 8weeks | 12weeks | 16weeks | 20weeks |
| Control                    | 5.6    | 4.9    | 5.5    | 6.5     | 5.8     | 5.6     |
|                            | 4.7    | 5.2    | 4.9    | 4.7     | 4.7     | 5.8     |
|                            | 5.2    | 4.7    | 4.8    | 5.8     | 5.2     | 5.6     |
|                            | 4.9    | 5.5    | 4.7    | 4.2     | 4.6     | 4.5     |
|                            | 5.3    | 4.6    | 5.2    | 4.9     | 5.7     | 5.9     |
|                            | 4.6    | 4.8    | 5.1    | 5.6     | 5.5     | 4.7     |
| DM                         | 4.3    | 5.6    | 22.1   | 23.5    | 25.5    | 26.5    |
|                            | 4.8    | 5.8    | 22.3   | 24.7    | 24.6    | 24.9    |
|                            | 4.6    | 4.6    | 19.8   | 25.6    | 26.3    | 27.5    |
|                            | 5.3    | 5.7    | 25.7   | 24.7    | 25.9    | 28.4    |
|                            | 6.1    | 4.6    | 24.9   | 26.8    | 26.4    | 26.7    |
|                            | 4.9    | 5.7    | 28.6   | 25.7    | 25.6    | 28.4    |
| DM+Ran 30mg/Kg             | 5.8    | 5.6    | 25.7   | 24.7    | 21.7    | 20.6    |
|                            | 6.3    | 5.9    | 23.6   | 25.8    | 20.5    | 19.8    |
|                            | 4.7    | 5.4    | 23.7   | 23.4    | 26.7    | 20.6    |
|                            | 4.4    | 5.5    | 18.6   | 19.8    | 19.9    | 21.5    |
|                            | 4.6    | 5.6    | 19.4   | 18.6    | 21.6    | 18.9    |
|                            | 4.5    | 5.1    | 25.4   | 25.4    | 22.8    | 19.9    |

**Figure1F**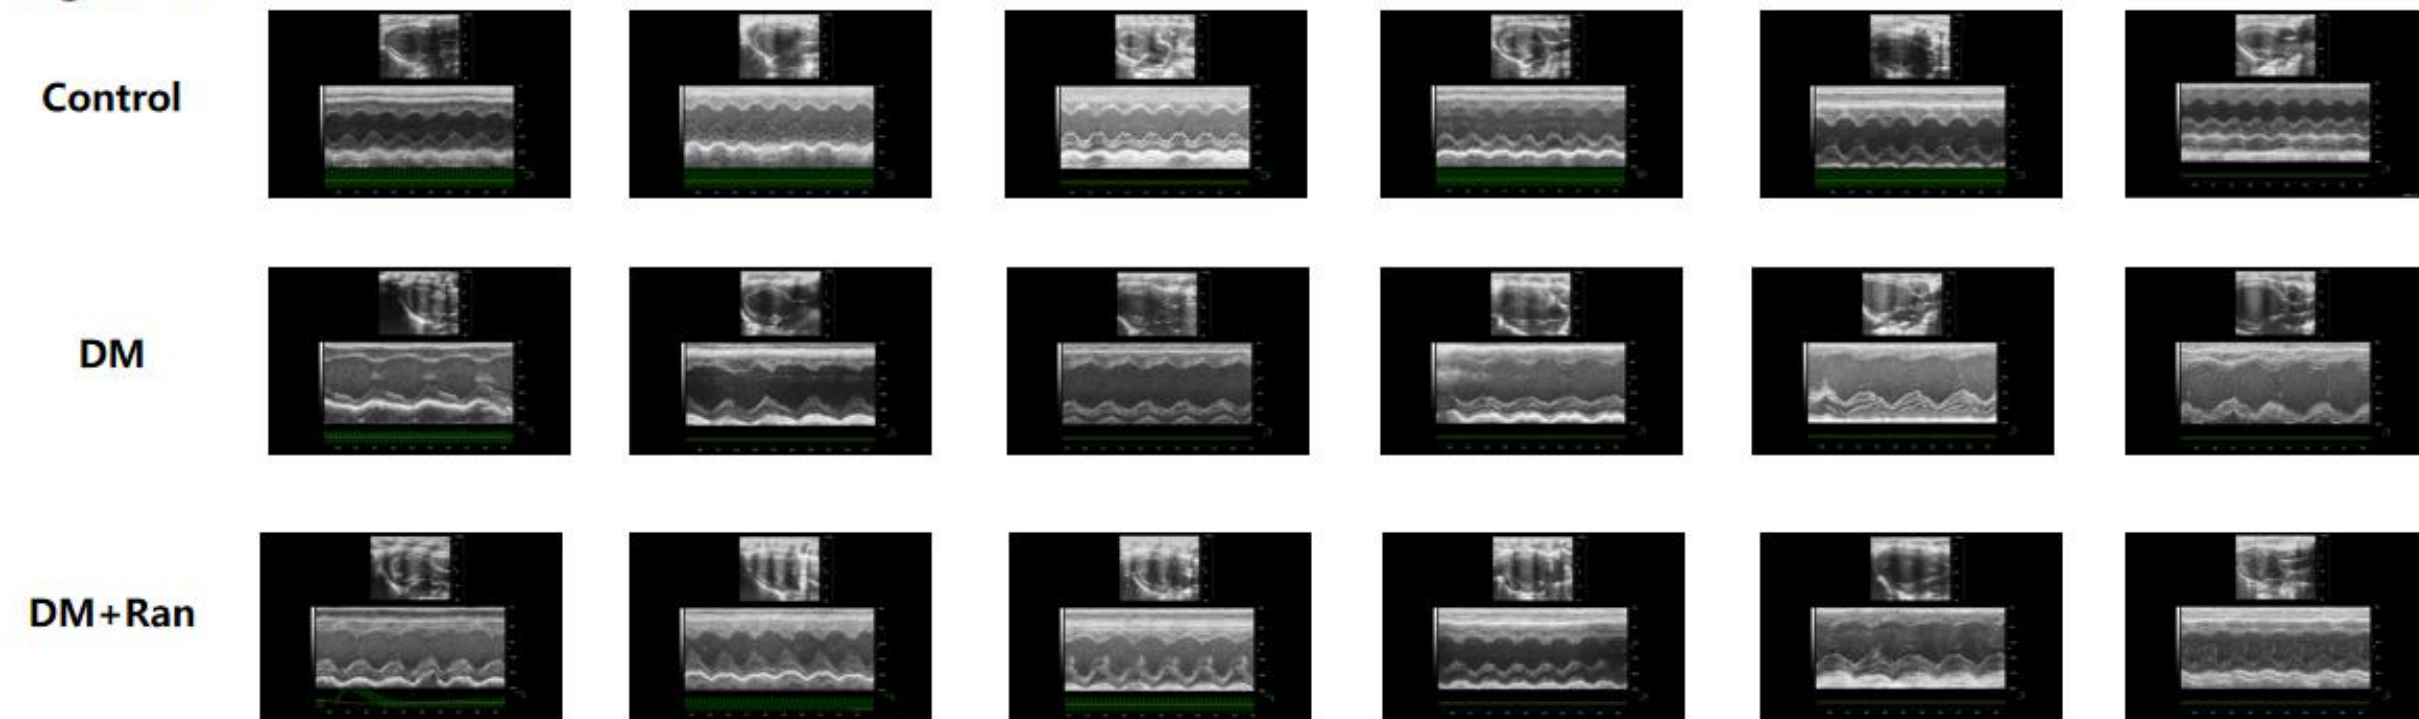**Figure1G**

| LVEF |           |           |           | LVFS |           |           |           |
|------|-----------|-----------|-----------|------|-----------|-----------|-----------|
|      | Control   | DM        | DM+Ran    |      | Control   | DM        | DM+Ran    |
|      | 69.146013 | 47.601025 | 52.997376 |      | 39.246116 | 24.999997 | 28.097723 |
|      | 68.983898 | 36.753855 | 58.831105 |      | 38.642299 | 18.5079   | 32.028464 |
|      | 73.892656 | 46.885832 | 59.308234 |      | 43.689314 | 24.474471 | 32.913174 |
|      | 73.995943 | 42.881029 | 55.329503 |      | 43.595034 | 22.058816 | 29.969888 |
|      | 69.83189  | 34.191186 | 59.944578 |      | 40.264649 | 17.282481 | 33.125002 |
|      | 71.812096 | 36.572498 | 56.519654 |      | 42.647051 | 18.32061  | 31.301285 |



**Figure2A**

**HE**

**Control**

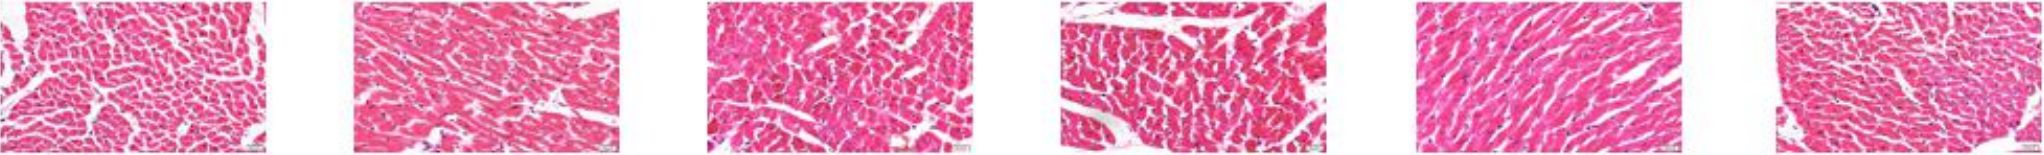

**DM**

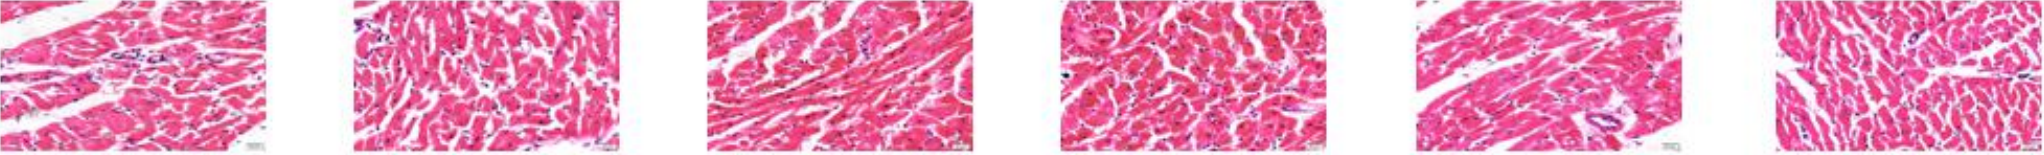

**DM+Ran**

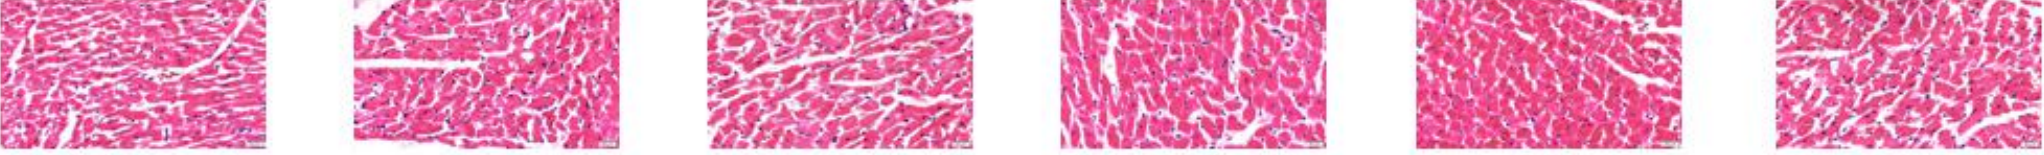

**Masson**

**Control**

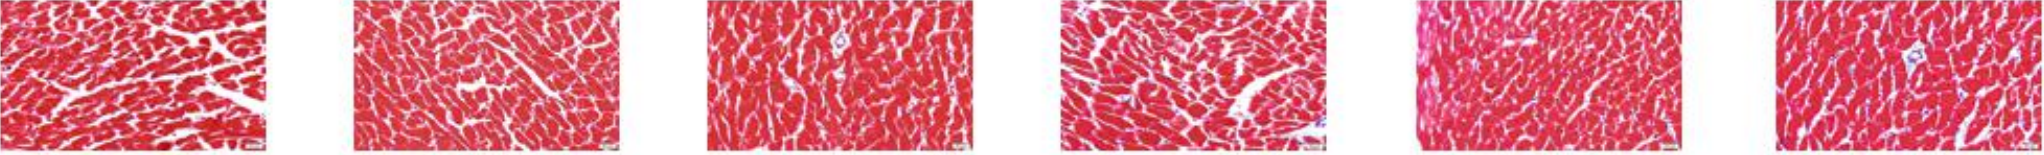

**DM**

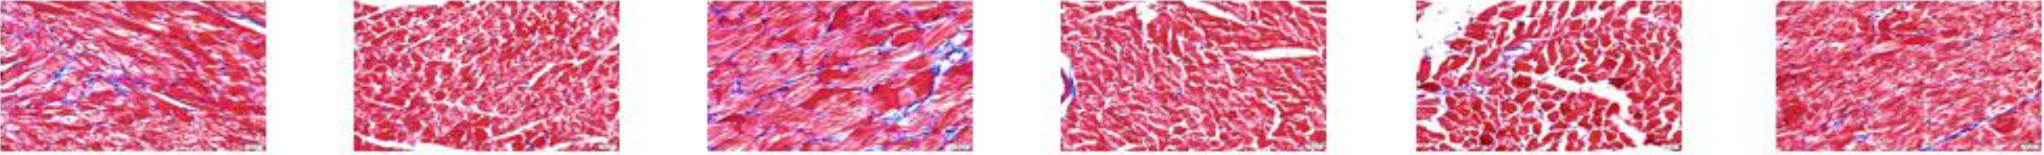

**DM+Ran**

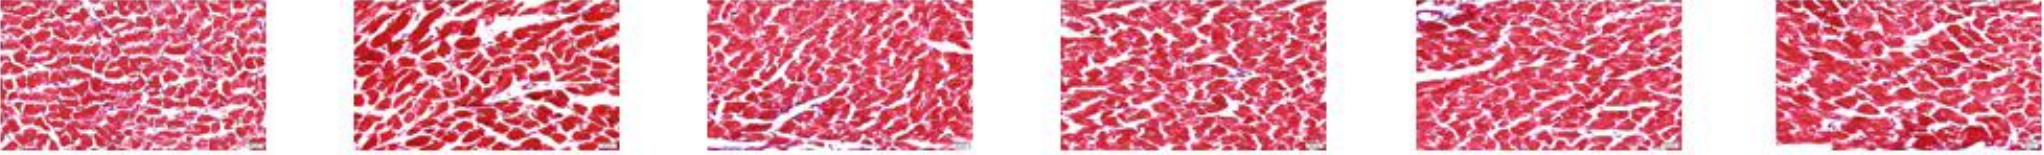



**Figure2B**

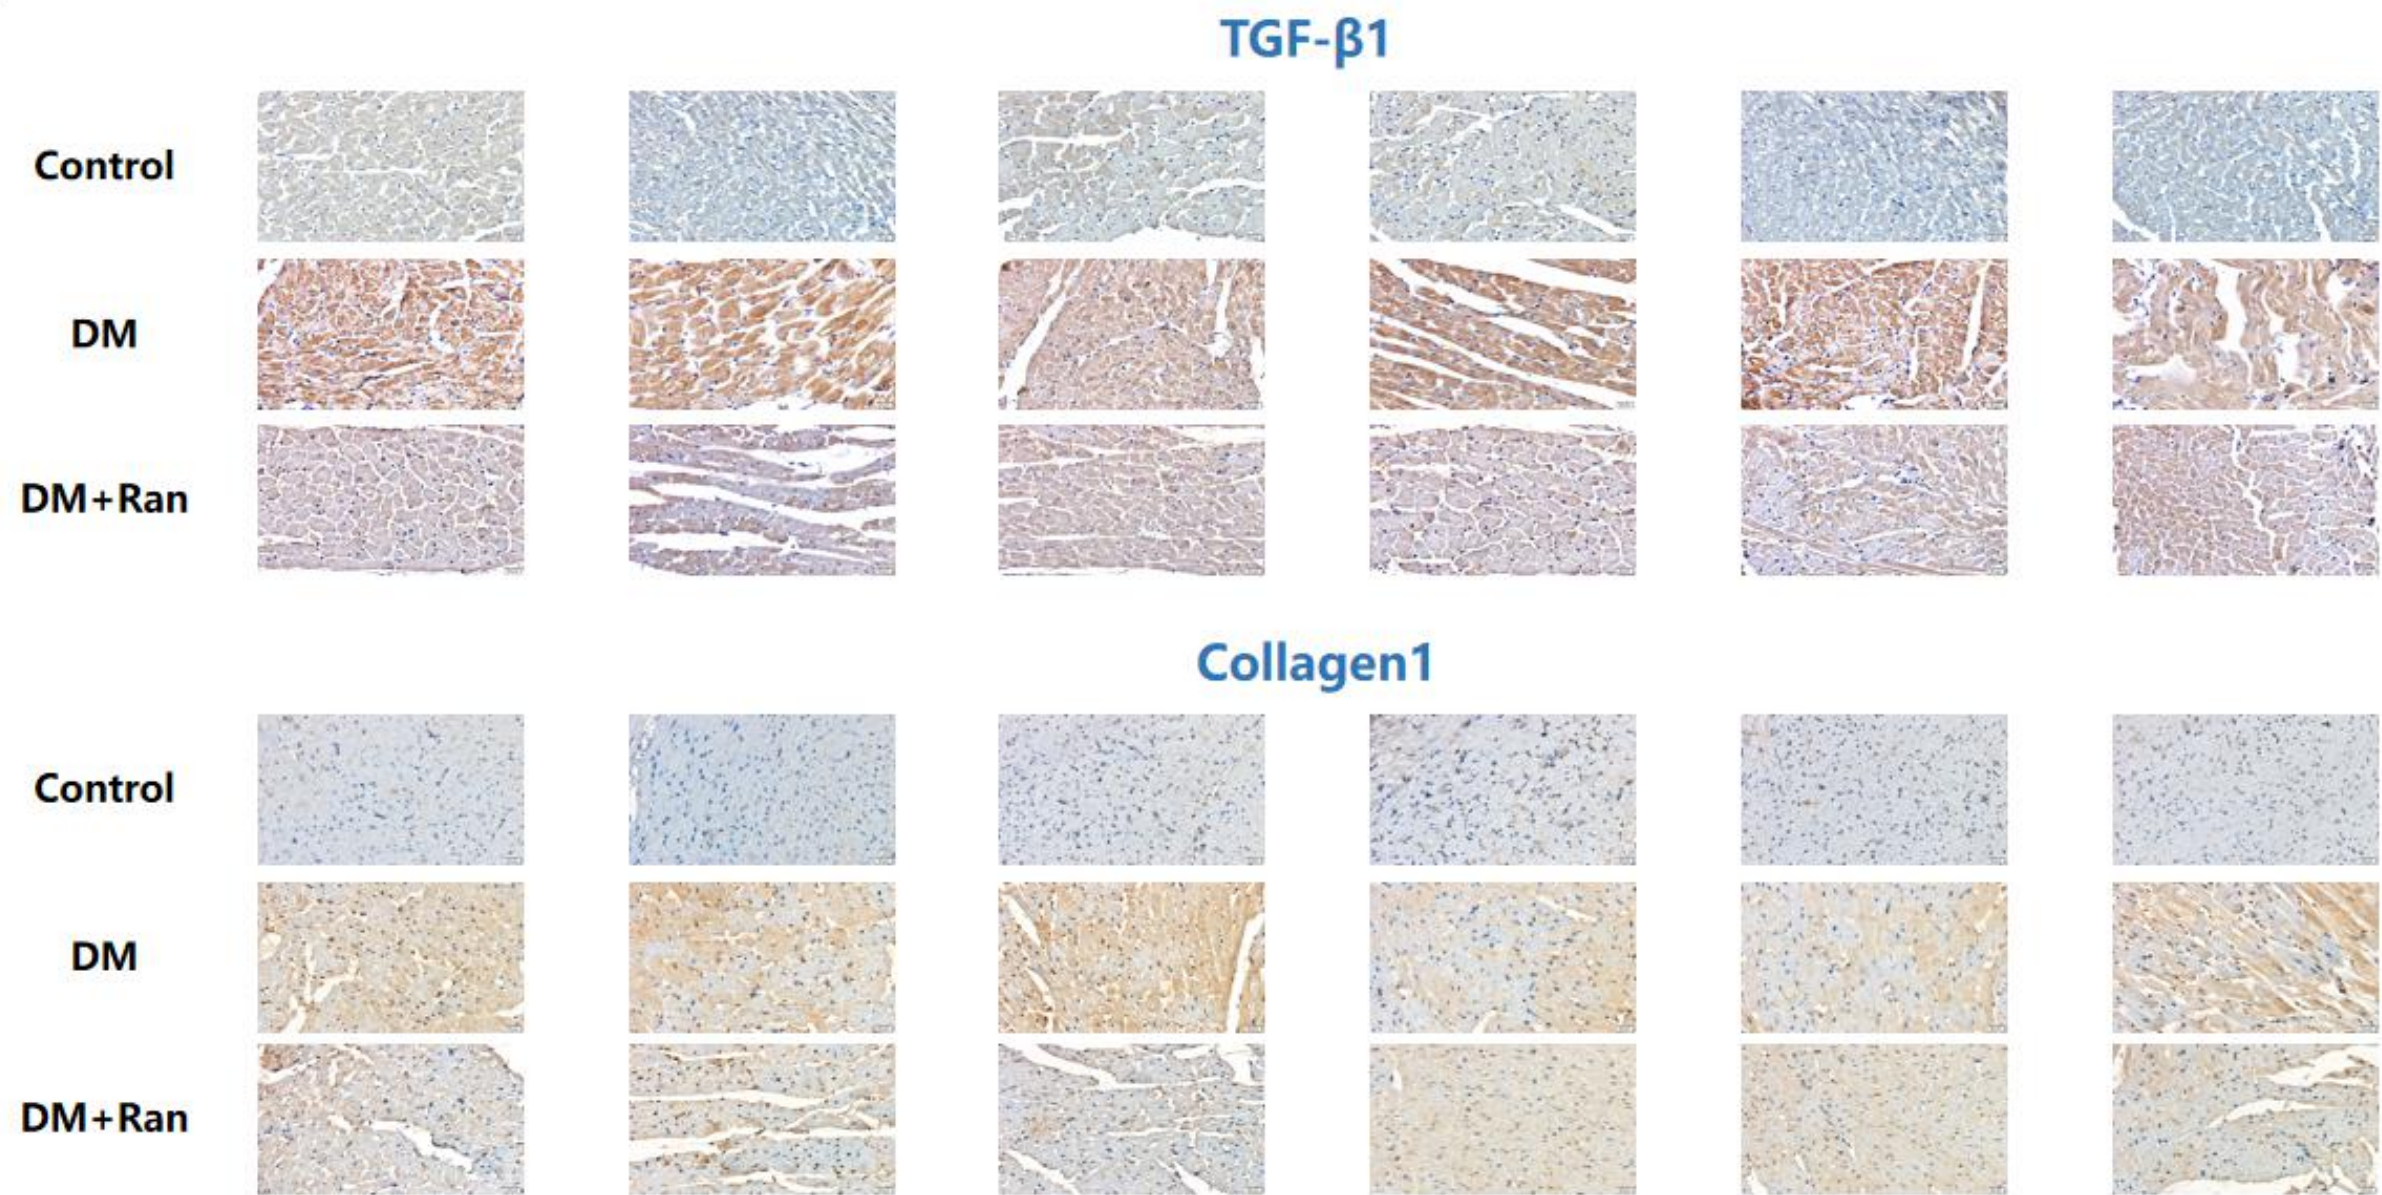



**Figure2B****Collagen3**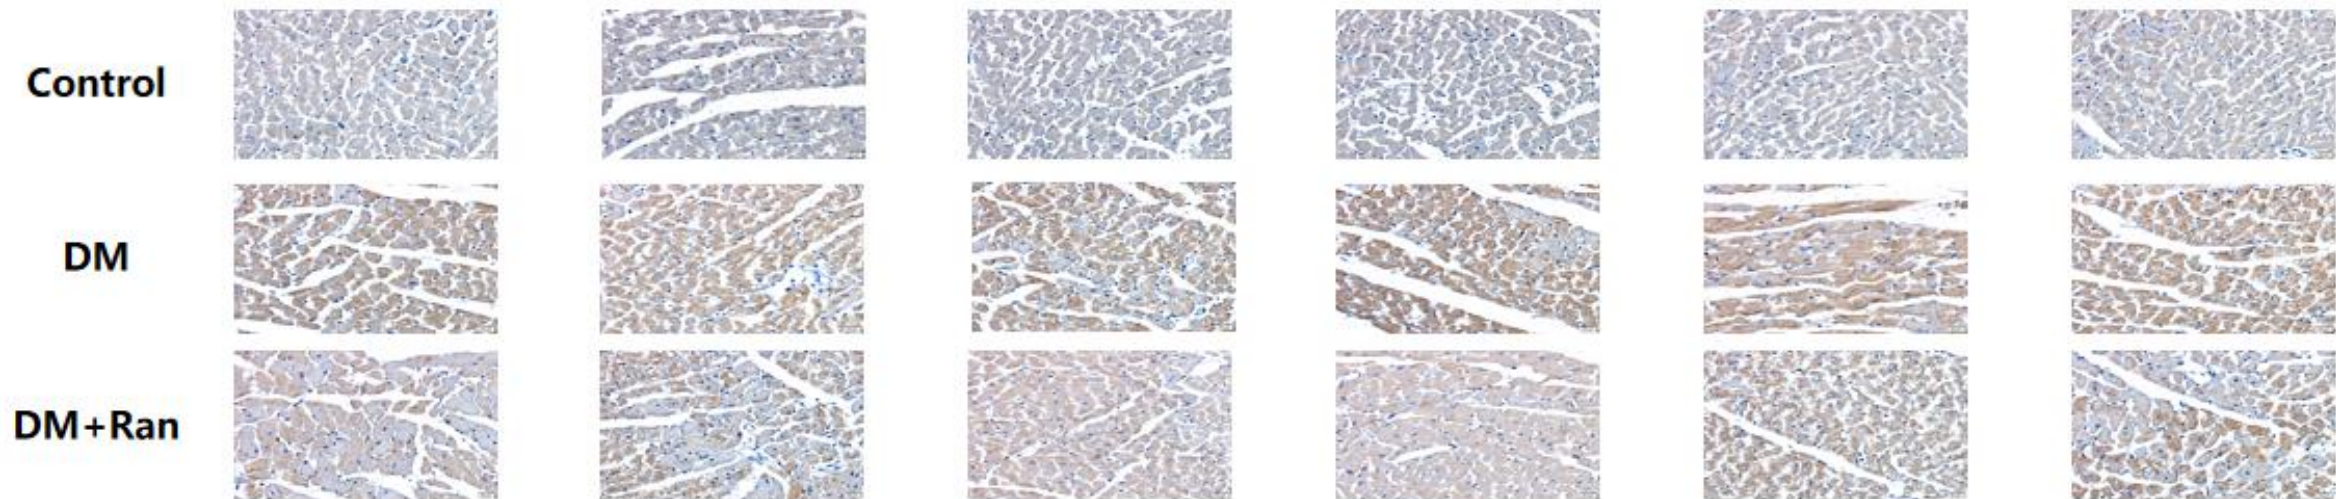**Figure2C**

|                  | <b>TGF-β 1</b> | <b>Collagen1</b> | <b>Collagen3</b> |
|------------------|----------------|------------------|------------------|
| <b>Control-1</b> | 7.71           | 6.05             | 8.59             |
| <b>Control-2</b> | 8.23           | 5.51             | 9.48             |
| <b>Control-3</b> | 6.05           | 4.93             | 14.43            |
| <b>Control-4</b> | 8.27           | 6.36             | 13.61            |
| <b>Control-5</b> | 8.96           | 5.39             | 14.22            |
| <b>Control-6</b> | 7.87           | 6.13             | 11.82            |
| <b>DM-1</b>      | 37.65          | 24.48            | 34.56            |
| <b>DM-2</b>      | 39.85          | 28.56            | 32.56            |
| <b>DM-3</b>      | 38.43          | 24.94            | 31.99            |
| <b>DM-4</b>      | 36.65          | 25.34            | 28.42            |
| <b>DM-5</b>      | 36.70          | 23.59            | 28.05            |
| <b>DM-6</b>      | 30.56          | 29.09            | 31.14            |
| <b>DM+Ran-1</b>  | 18.25          | 13.57            | 14.29            |
| <b>DM+Ran-2</b>  | 16.61          | 11.61            | 16.12            |
| <b>DM+Ran-3</b>  | 17.2           | 15.36            | 21.11            |
| <b>DM+Ran-4</b>  | 17.86          | 11.64            | 12.91            |
| <b>DM+Ran-5</b>  | 22.28          | 10.60            | 19.97            |
| <b>DM+Ran-6</b>  | 19.16          | 17.47            | 14.46            |

**Figure2D**

|           | <b>GAPDH</b> | <b>TGF- <math>\beta</math> 1</b> |
|-----------|--------------|----------------------------------|
| Control-1 | 14.51        | 26.92                            |
| Control-2 | 14.69        | 26.95                            |
| Control-3 | 15.29        | 27.34                            |
| Control-4 | 15.34        | 27.94                            |
| Control-5 | 15.22        | 27.58                            |
| Control-6 | 15.74        | 28.18                            |
| DM-1      | 14.73        | 25.4                             |
| DM-2      | 15.49        | 25.83                            |
| DM-3      | 14.59        | 25.01                            |
| DM-4      | 15.73        | 26.29                            |
| DM-5      | 15.86        | 26.11                            |
| DM-6      | 14.34        | 24.99                            |
| DM+Ran-1  | 15.29        | 26.26                            |
| DM+Ran-2  | 15.64        | 26.63                            |
| DM+Ran-3  | 14.51        | 25.55                            |
| DM+Ran-4  | 14.56        | 25.64                            |
| DM+Ran-5  | 14.72        | 25.59                            |
| DM+Ran-6  | 14.83        | 26.45                            |

|           | <b>GAPDH</b> | <b>Collagen1</b> |
|-----------|--------------|------------------|
| Control-1 | 15.27        | 26.73            |
| Control-2 | 15.13        | 26.57            |
| Control-3 | 15.29        | 26.49            |
| Control-4 | 15.34        | 26.38            |
| Control-5 | 14.64        | 25.75            |
| Control-6 | 14.27        | 25.39            |
| DM-1      | 14.73        | 24.84            |
| DM-2      | 14.68        | 24.52            |
| DM-3      | 15.86        | 25.34            |
| DM-4      | 14.73        | 23.98            |
| DM-5      | 15.86        | 25.61            |
| DM-6      | 14.34        | 24.39            |
| DM+Ran-1  | 15.29        | 25.55            |
| DM+Ran-2  | 14.44        | 24.84            |
| DM+Ran-3  | 14.51        | 24.91            |
| DM+Ran-4  | 14.56        | 24.87            |
| DM+Ran-5  | 14.72        | 24.61            |
| DM+Ran-6  | 15.36        | 25.94            |

|           | <b>GAPDH</b> | <b>Collagen3</b> |
|-----------|--------------|------------------|
| Control-1 | 14.51        | 28.55            |
| Control-2 | 15.13        | 29.75            |
| Control-3 | 15.29        | 29.37            |
| Control-4 | 15.34        | 29.28            |
| Control-5 | 15.22        | 29.64            |
| Control-6 | 14.27        | 28.49            |
| DM-1      | 14.73        | 27.14            |
| DM-2      | 15.49        | 27.88            |
| DM-3      | 14.59        | 27.27            |
| DM-4      | 15.73        | 28.04            |
| DM-5      | 15.86        | 28.33            |
| DM-6      | 15.47        | 28.23            |
| DM+Ran-1  | 14.29        | 27.76            |
| DM+Ran-2  | 14.44        | 27.53            |
| DM+Ran-3  | 14.51        | 27.72            |
| DM+Ran-4  | 14.56        | 27.36            |
| DM+Ran-5  | 15.94        | 29.19            |
| DM+Ran-6  | 15.36        | 28.56            |



Figure 2E-TGF- $\beta$ 1

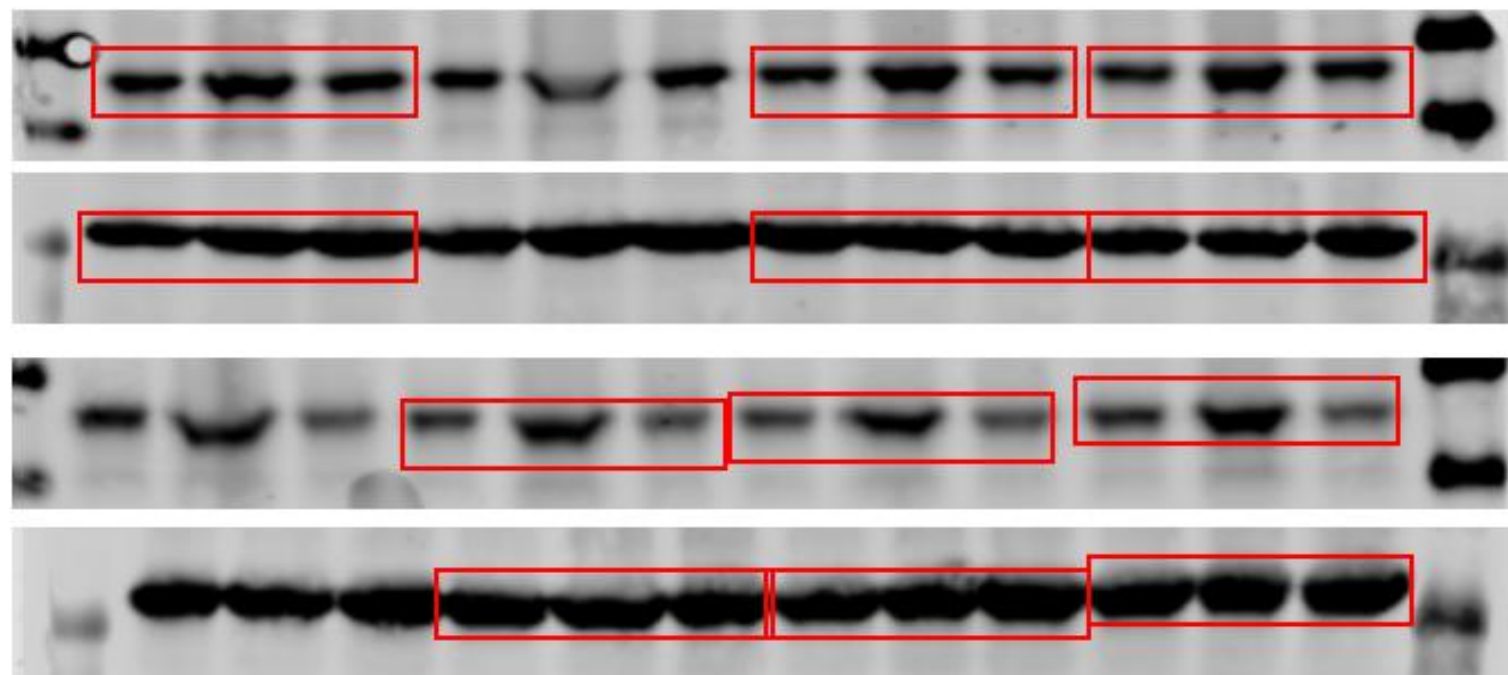

Figure 2E-Collagen1

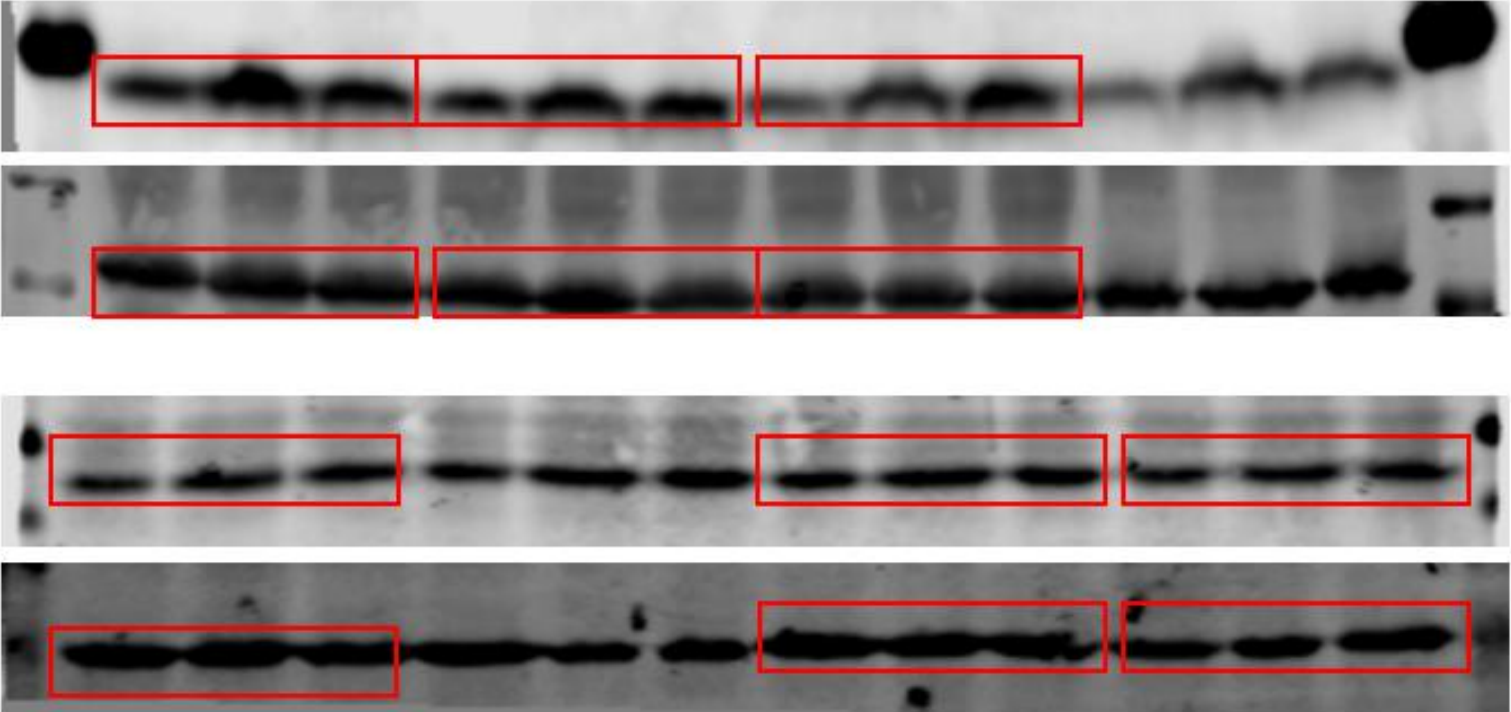



Figure 2E-Collagen3

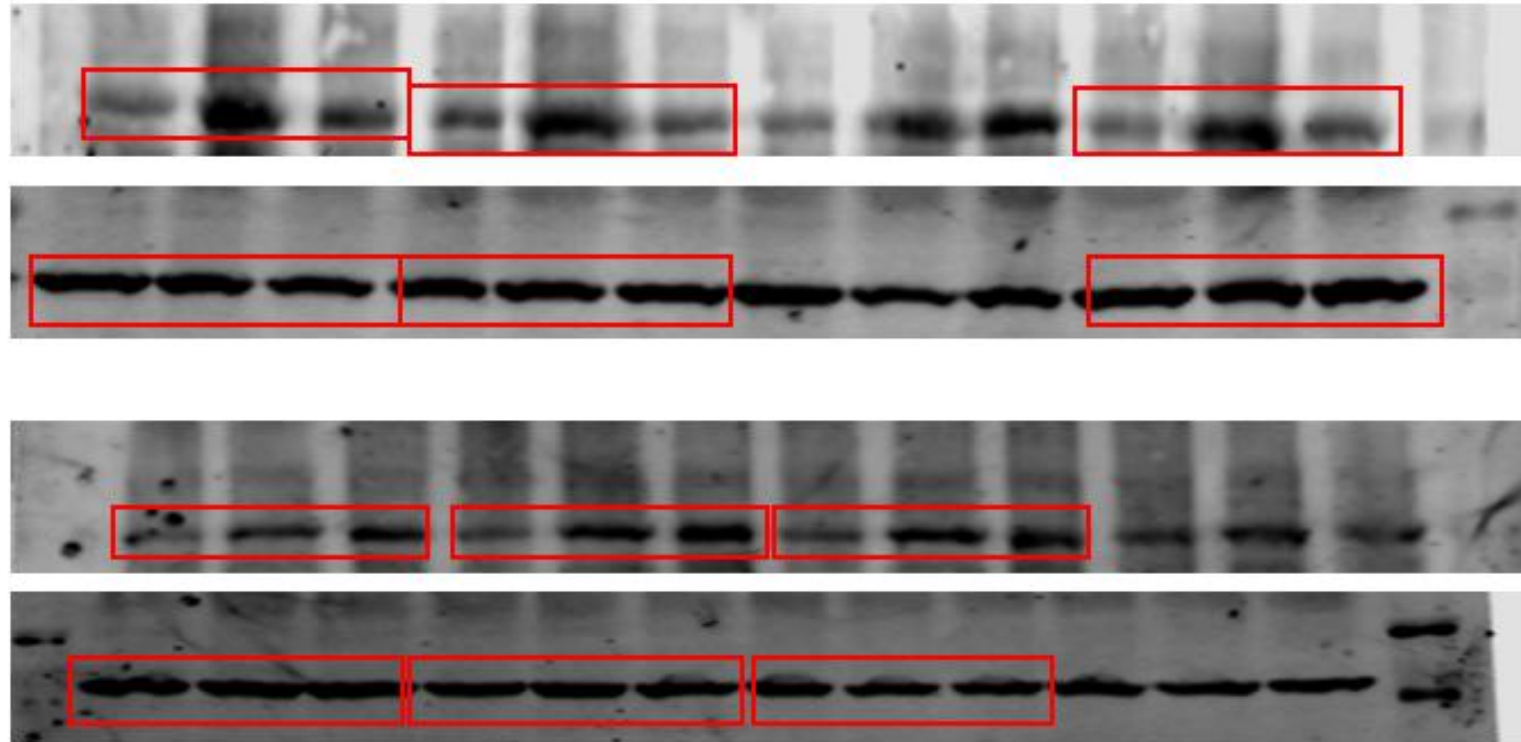

Figure 3A

Caspase-1

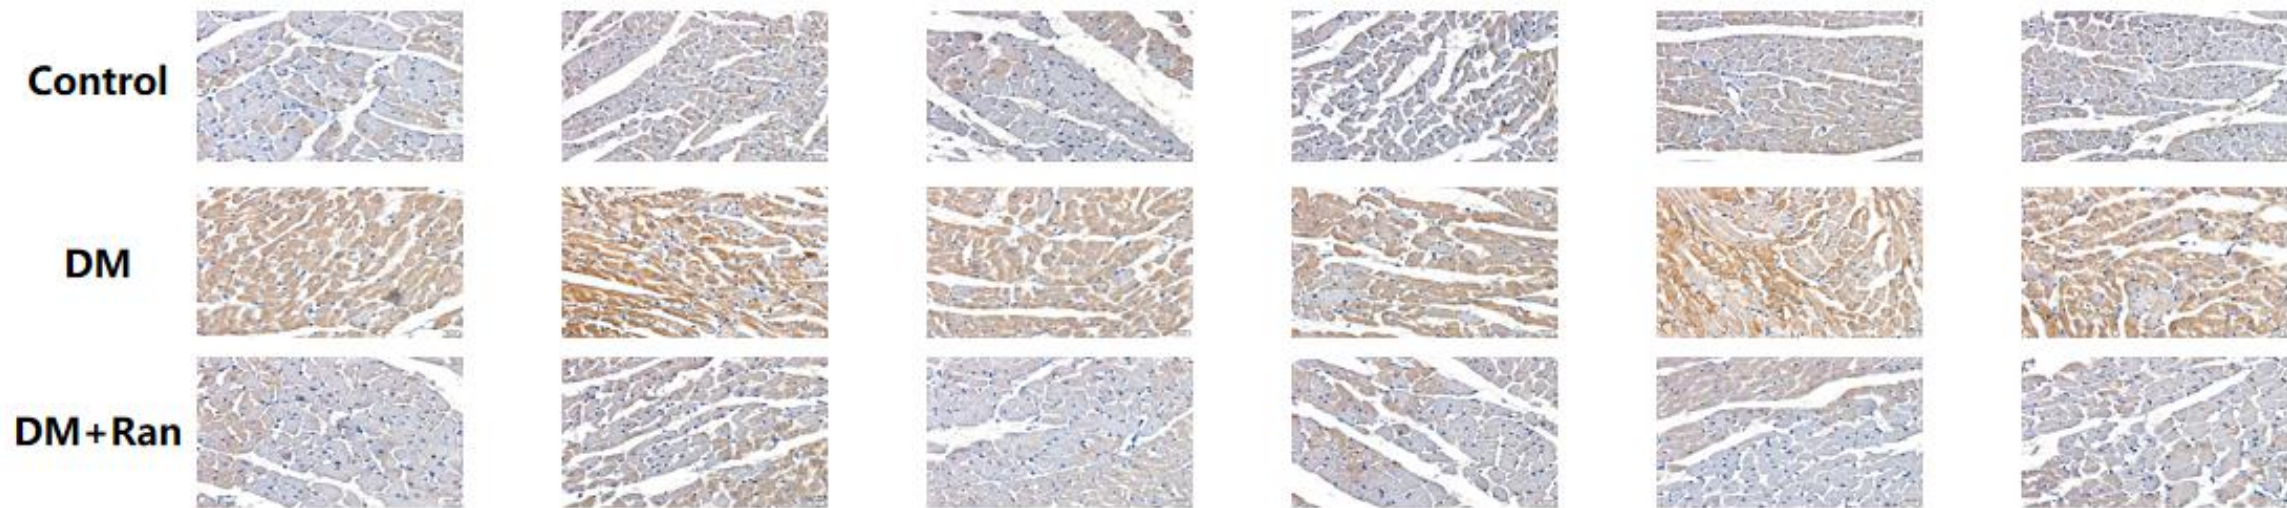

IL-1 $\beta$

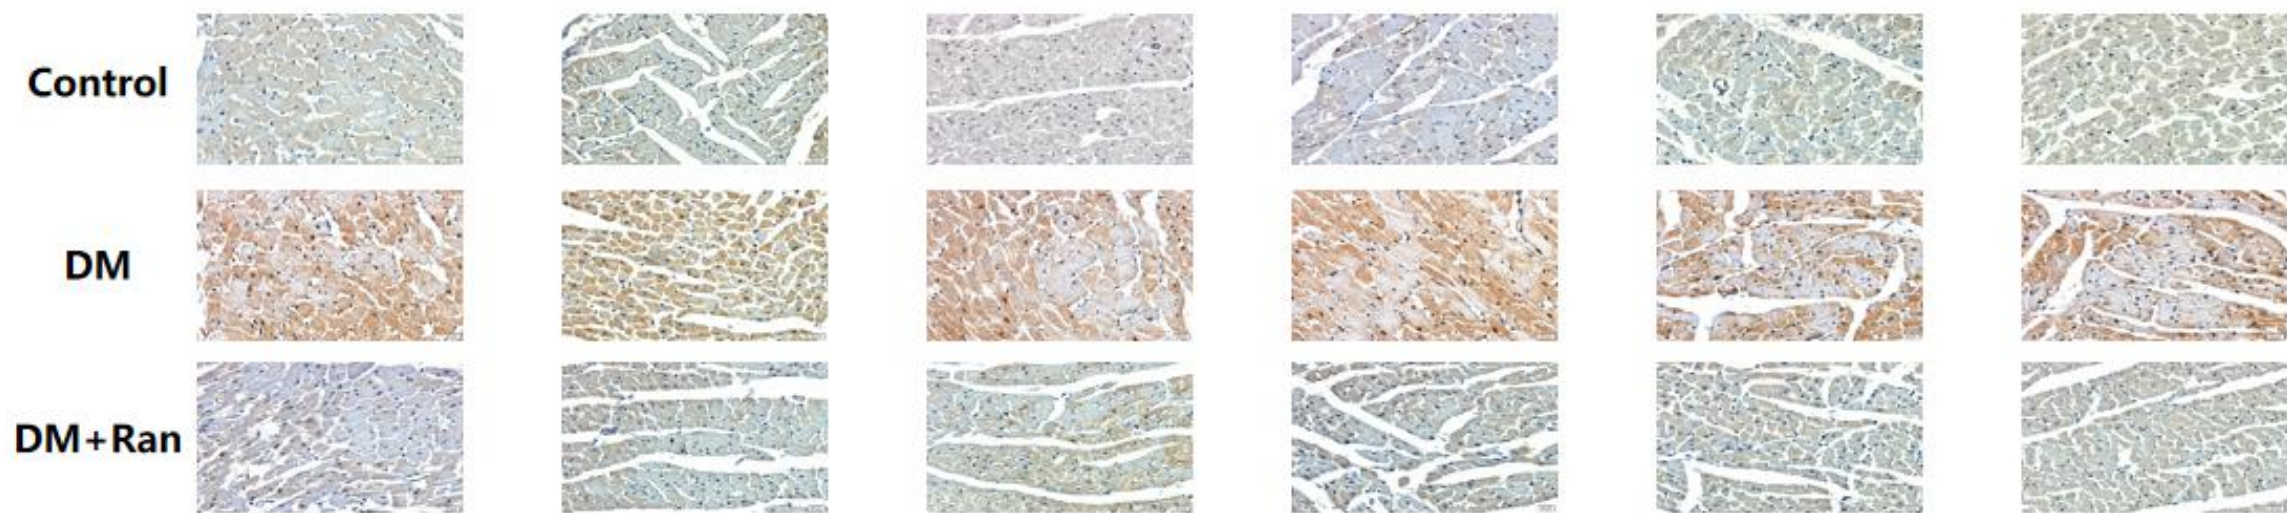



**Figure3A****GSDMD****Control**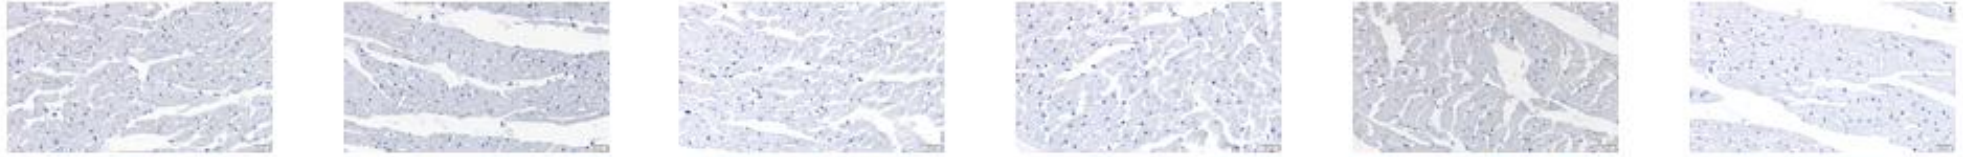**DM**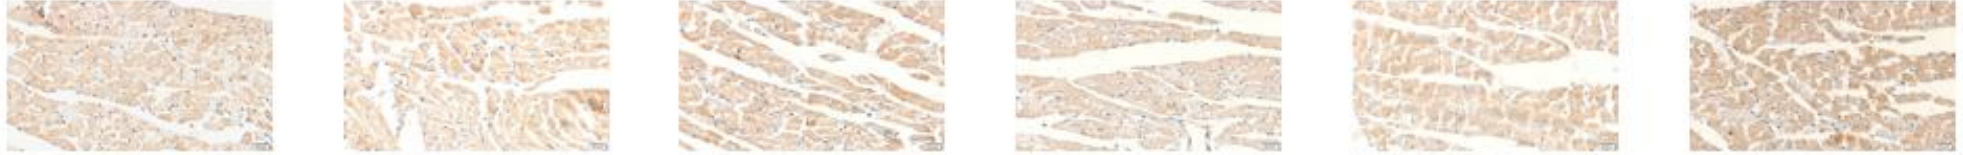**DM+Ran**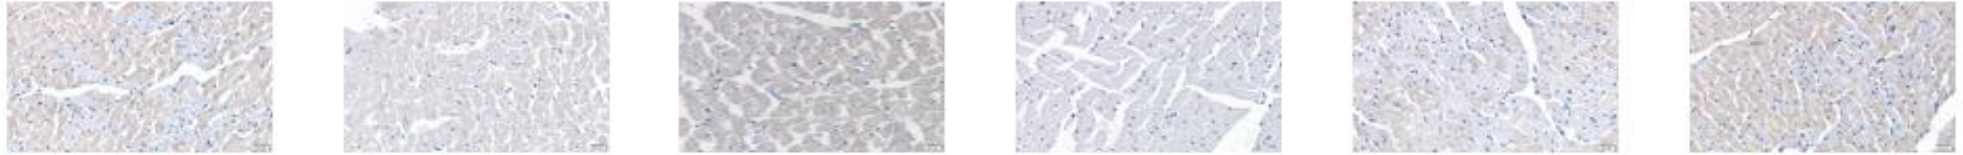**Figure3B-D**

|                  | <b>Caspase-1</b> | <b>IL-1 <math>\beta</math></b> | <b>GSDMD</b> |
|------------------|------------------|--------------------------------|--------------|
| <b>Control-1</b> | 7.18             | 7.12                           | 3.46         |
| <b>Control-2</b> | 7.86             | 6.79                           | 3.94         |
| <b>Control-3</b> | 8.7              | 9.93                           | 4.85         |
| <b>Control-4</b> | 8.2              | 11.01                          | 2.8          |
| <b>Control-5</b> | 9.96             | 8.14                           | 3.57         |
| <b>Control-6</b> | 10.29            | 8.91                           | 4.36         |
| <b>DM-1</b>      | 36.38            | 26.73                          | 27.68        |
| <b>DM-2</b>      | 39.38            | 30.5                           | 24.92        |
| <b>DM-3</b>      | 40.27            | 32.98                          | 28.18        |
| <b>DM-4</b>      | 34.85            | 30.27                          | 22.74        |
| <b>DM-5</b>      | 38.42            | 32.54                          | 17.27        |
| <b>DM-6</b>      | 34.96            | 28.07                          | 22.98        |
| <b>DM+Ran-1</b>  | 17.22            | 14.55                          | 14.36        |
| <b>DM+Ran-2</b>  | 22.87            | 14.46                          | 10.6         |
| <b>DM+Ran-3</b>  | 16.94            | 13.39                          | 13.95        |
| <b>DM+Ran-4</b>  | 17.49            | 15.24                          | 14.81        |
| <b>DM+Ran-5</b>  | 20.14            | 12.65                          | 13.39        |
| <b>DM+Ran-6</b>  | 18.3             | 15.35                          | 16.81        |

**Figure3E-F**

|           | <b>GAPDH</b> | <b>Caspase-1</b> |           | <b>GAPDH</b> | <b>IL-1 <math>\beta</math></b> |
|-----------|--------------|------------------|-----------|--------------|--------------------------------|
| Control-1 | 15.27        | 25.73            | Control-1 | 14.51        | 23.86                          |
| Control-2 | 15.13        | 25.75            | Control-2 | 15.13        | 24.65                          |
| Control-3 | 15.29        | 25.67            | Control-3 | 15.29        | 24.73                          |
| Control-4 | 15.34        | 25.74            | Control-4 | 15.34        | 24.81                          |
| Control-5 | 15.22        | 25.69            | Control-5 | 15.22        | 24.95                          |
| Control-6 | 14.27        | 24.75            | Control-6 | 14.27        | 23.64                          |
| DM-1      | 14.73        | 23.42            | DM-1      | 14.73        | 23.19                          |
| DM-2      | 14.68        | 23.39            | DM-2      | 15.49        | 23.61                          |
| DM-3      | 15.86        | 24.55            | DM-3      | 14.59        | 22.75                          |
| DM-4      | 15.73        | 24.22            | DM-4      | 15.73        | 23.82                          |
| DM-5      | 15.86        | 24.65            | DM-5      | 14.27        | 22.43                          |
| DM-6      | 15.47        | 24.66            | DM-6      | 14.34        | 22.54                          |
| DM+Ran-1  | 15.29        | 24.76            | DM+Ran-1  | 14.29        | 22.9                           |
| DM+Ran-2  | 15.64        | 24.95            | DM+Ran-2  | 15.64        | 24.09                          |
| DM+Ran-3  | 14.51        | 23.75            | DM+Ran-3  | 14.51        | 22.92                          |
| DM+Ran-4  | 15.72        | 25.31            | DM+Ran-4  | 15.72        | 24.35                          |
| DM+Ran-5  | 15.94        | 25.14            | DM+Ran-5  | 14.72        | 23.23                          |
| DM+Ran-6  | 15.36        | 25.34            | DM+Ran-6  | 14.83        | 23.44                          |



Figure 3G-Caspase-1

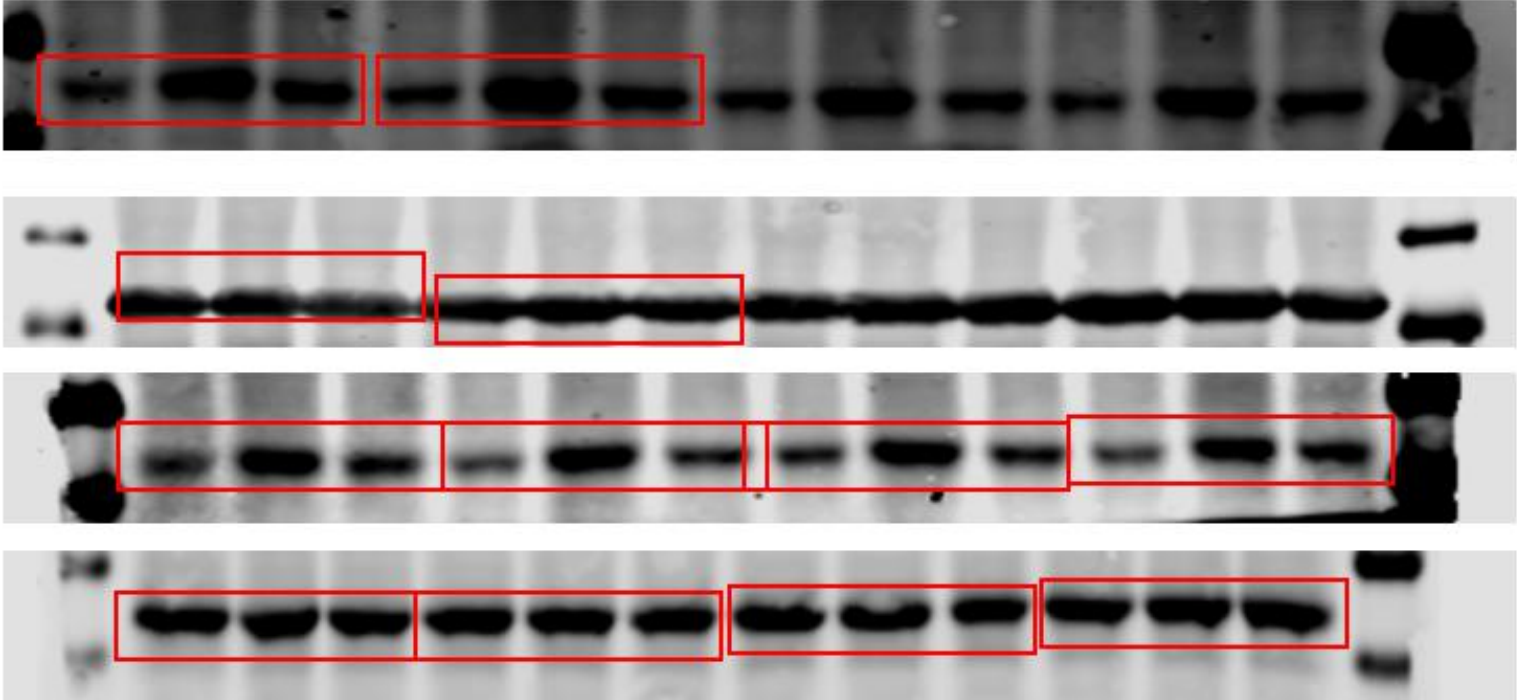

Figure 3H-IL-1 $\beta$

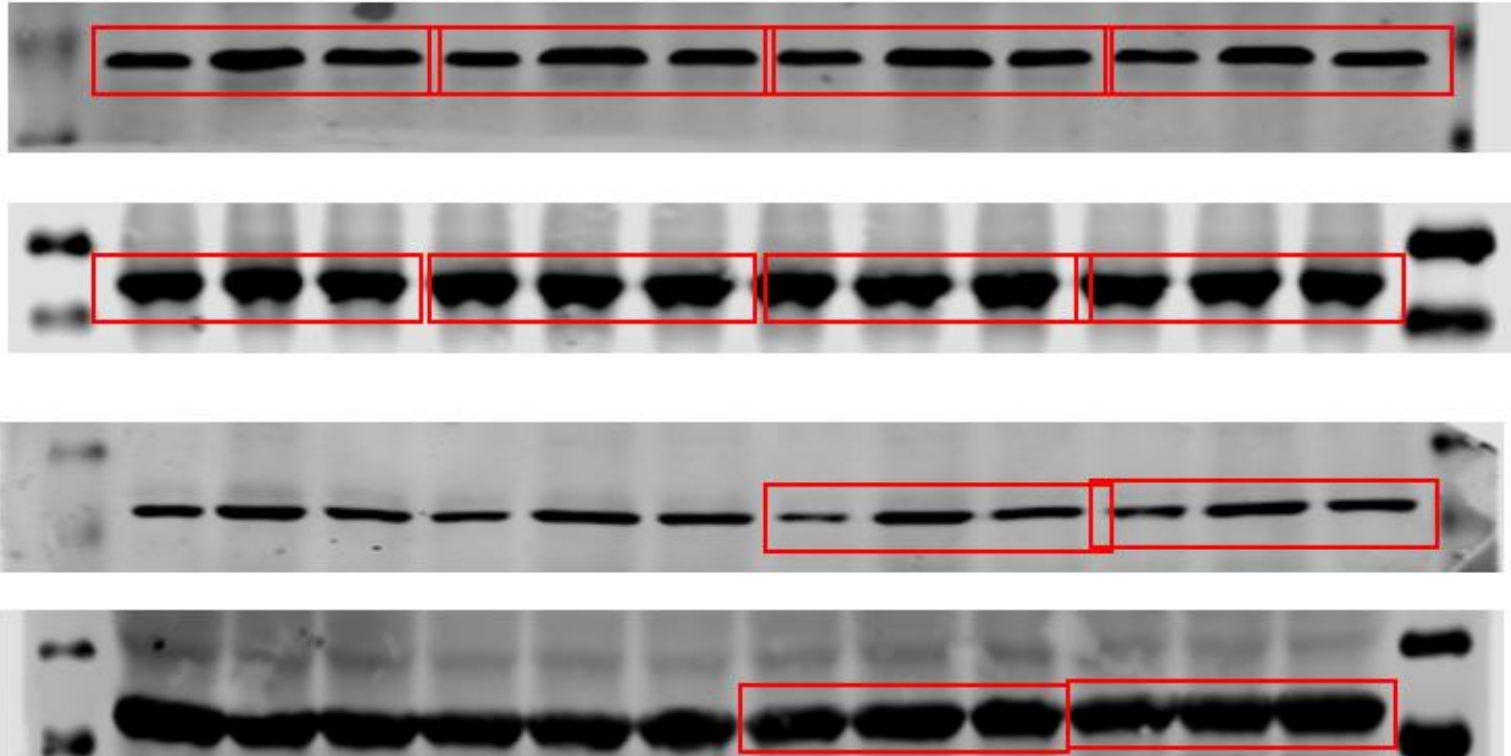



Figure3I-GSDMD

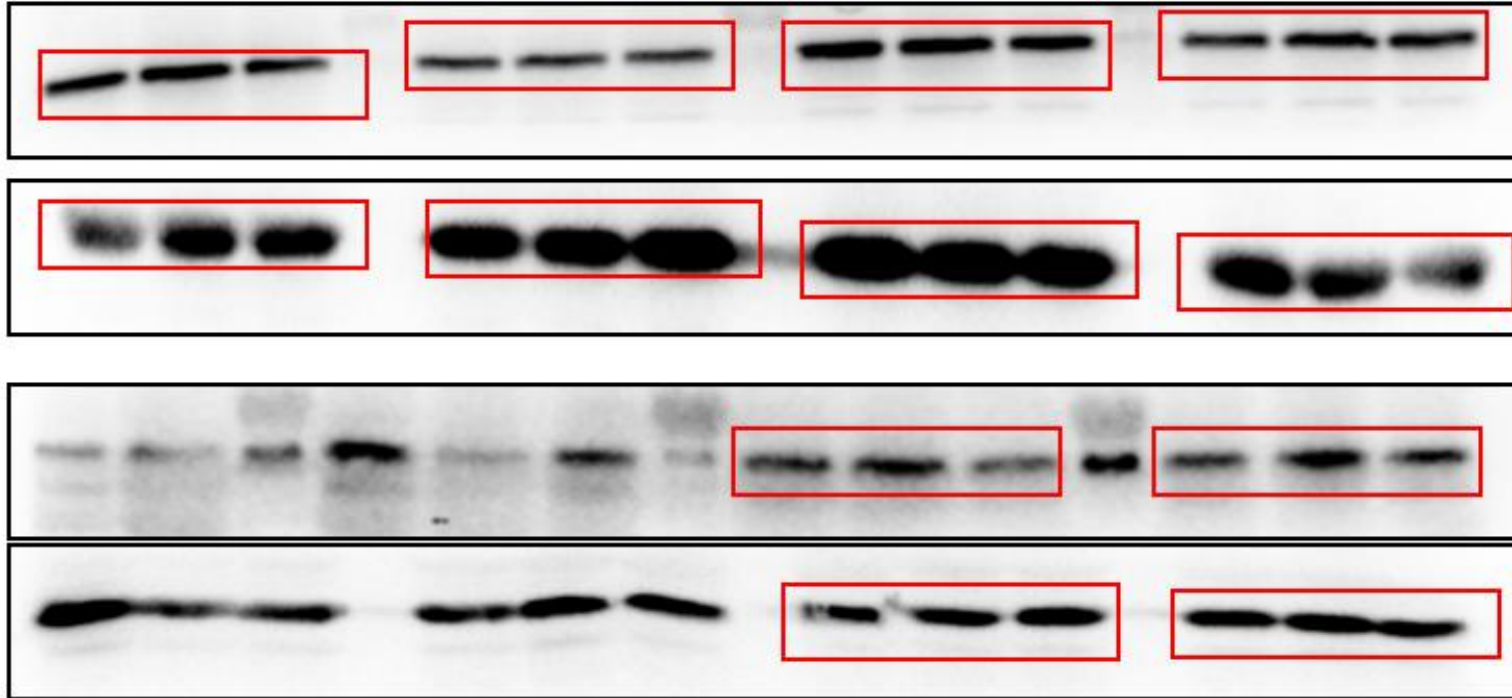

# Figure4A

dataset: 1  
**Target:** *CASP1*  
 length: 1316  
**MiRNA:** *rno-miR-135b*  
 length: 23

mfe: -21.3 kcal/mol  
 p-value: undefined

*Position: 181*

```

target 5' G   UAAAAA   CCCC G  GC   G   3'
          UCAC     AGGA     G   AAGCCA
          AGUG     UCCU     C   UUCGGU
miRNA  3'   UA       UA    UU    AU  5'
  
```

```

Caspase-1-WT 5'-- AAAAGGACCCCGGGCAAGCCAGA --3'
Rno-miR-135b 3'-- AGUGUAUCCUACUUUUCGGUAU --5'
Caspase-1-Mut 5'-- AAAAGGACCCCGGGCGAATGGGA --3'
  
```

|                          | miRNA          | Background | Firefly | Renilla  | R/F    |
|--------------------------|----------------|------------|---------|----------|--------|
| CDS+CDS+3' UTR CASP1     | NC1            | 70         | 1337104 | 15952665 | 11.931 |
|                          | NC2            | 73         | 1442564 | 16763688 | 11.621 |
|                          | NC3            | 79         | 1438264 | 17726661 | 12.325 |
|                          | rno-miR-135b 1 | 80         | 1219363 | 7153338  | 5.866  |
|                          | rno-miR-135b 2 | 71         | 1567536 | 8919137  | 5.69   |
|                          | rno-miR-135b 3 | 68         | 1388713 | 8431935  | 6.072  |
| CDS+CDS+3' UTR mut CASP1 | NC1            | 81         | 659318  | 5109513  | 7.75   |
|                          | NC2            | 86         | 483149  | 4014036  | 8.308  |
|                          | NC3            | 92         | 497855  | 4063386  | 8.162  |
|                          | rno-miR-135b 1 | 77         | 692401  | 5654557  | 8.167  |
|                          | rno-miR-135b 2 | 78         | 612271  | 5132015  | 8.382  |
|                          | rno-miR-135b 3 | 73         | 616980  | 4948909  | 8.021  |



**Figure4B-D**

|                   | U6    | miR-135b |
|-------------------|-------|----------|
| NG+AMO-NC-1       | 11.21 | 27.42    |
| NG+AMO-NC-2       | 11.28 | 27.45    |
| NG+AMO-NC-3       | 11.82 | 27.93    |
| HG+AMO-NC-1       | 11.9  | 28.82    |
| HG+AMO-NC-2       | 11.87 | 28.92    |
| HG+AMO-NC-3       | 11.64 | 28.73    |
| HG+Ran+AMO-NC-1   | 11.46 | 27.79    |
| HG+Ran+AMO-NC-2   | 11.2  | 27.51    |
| HG+Ran+AMO-NC-3   | 11.11 | 27.75    |
| HG+Ran+AMO-135b-1 | 11.12 | 29.58    |
| HG+Ran+AMO-135b-2 | 11.33 | 29.91    |
| HG+Ran+AMO-135b-3 | 11.41 | 29.92    |

|                   | GAPDH | Caspase-1 |
|-------------------|-------|-----------|
| NG+AMO-NC-1       | 17.9  | 30.03     |
| NG+AMO-NC-2       | 17.89 | 30.04     |
| NG+AMO-NC-3       | 16.21 | 28.3      |
| HG+AMO-NC-1       | 17.44 | 28.08     |
| HG+AMO-NC-2       | 15.84 | 26.29     |
| HG+AMO-NC-3       | 15.86 | 26.28     |
| HG+Ran+AMO-NC-1   | 17.33 | 29.01     |
| HG+Ran+AMO-NC-2   | 15.82 | 27.51     |
| HG+Ran+AMO-NC-3   | 15.76 | 27.54     |
| HG+Ran+AMO-135b-1 | 16.22 | 27.2      |
| HG+Ran+AMO-135b-2 | 16.23 | 27.34     |
| HG+Ran+AMO-135b-3 | 16.26 | 27.35     |

|                   | GAPDH | IL-1 $\beta$ |
|-------------------|-------|--------------|
| NG+AMO-NC-1       | 17.9  | 26.71        |
| NG+AMO-NC-2       | 17.89 | 26.66        |
| NG+AMO-NC-3       | 17.94 | 26.71        |
| HG+AMO-NC-1       | 17.44 | 25.35        |
| HG+AMO-NC-2       | 15.86 | 24.02        |
| HG+AMO-NC-3       | 15.91 | 24.01        |
| HG+Ran+AMO-NC-1   | 17.78 | 26.34        |
| HG+Ran+AMO-NC-2   | 15.81 | 24.4         |
| HG+Ran+AMO-NC-3   | 15.76 | 24.36        |
| HG+Ran+AMO-135b-1 | 17.75 | 25.92        |
| HG+Ran+AMO-135b-2 | 16.23 | 24.49        |
| HG+Ran+AMO-135b-3 | 16.26 | 24.5         |

Figure 4D-F

caspase-1

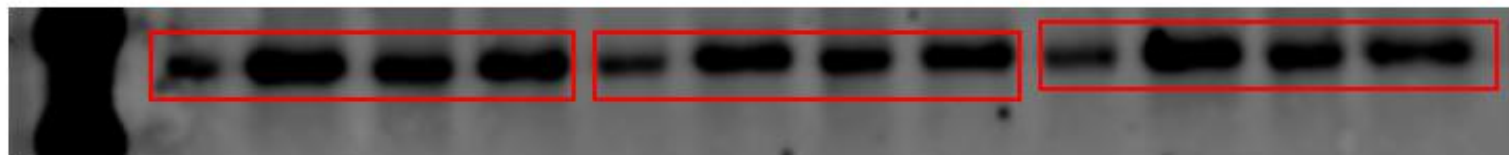

IL-1 $\beta$

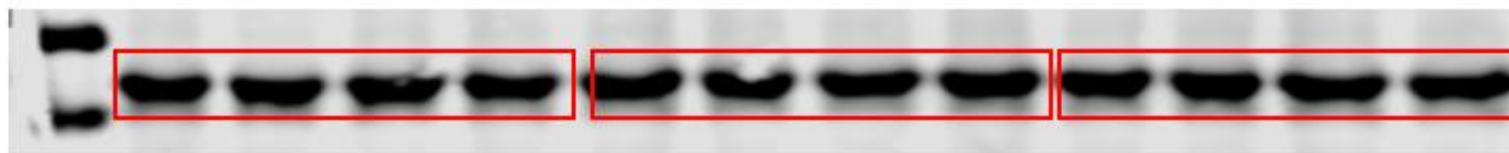

GSDMD

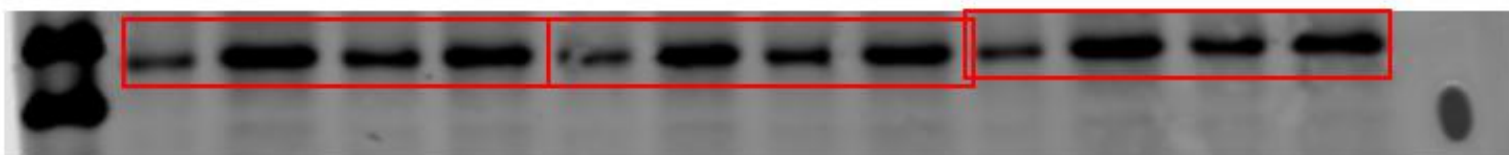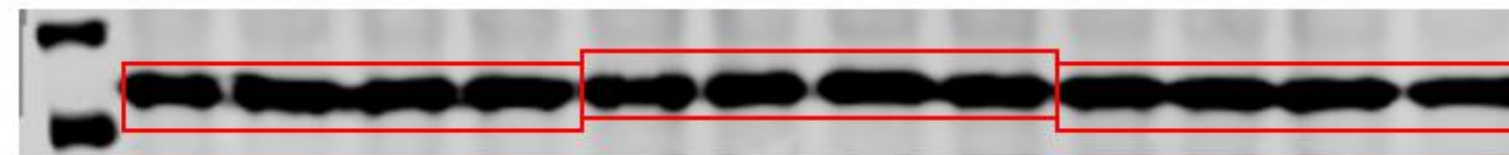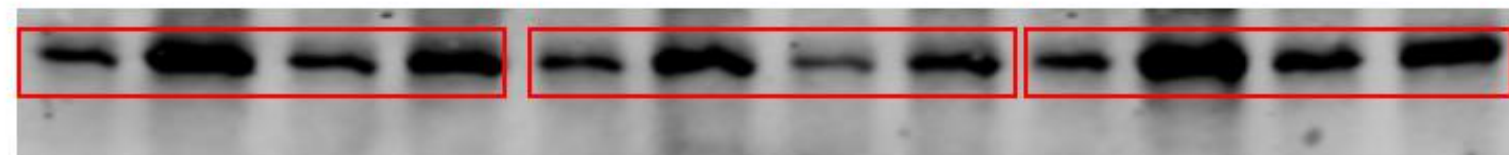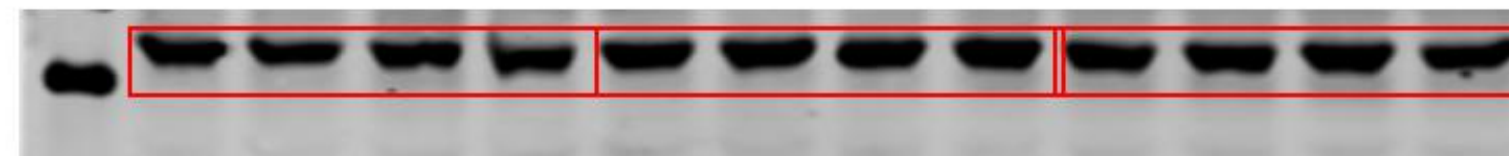

**Figure4G**

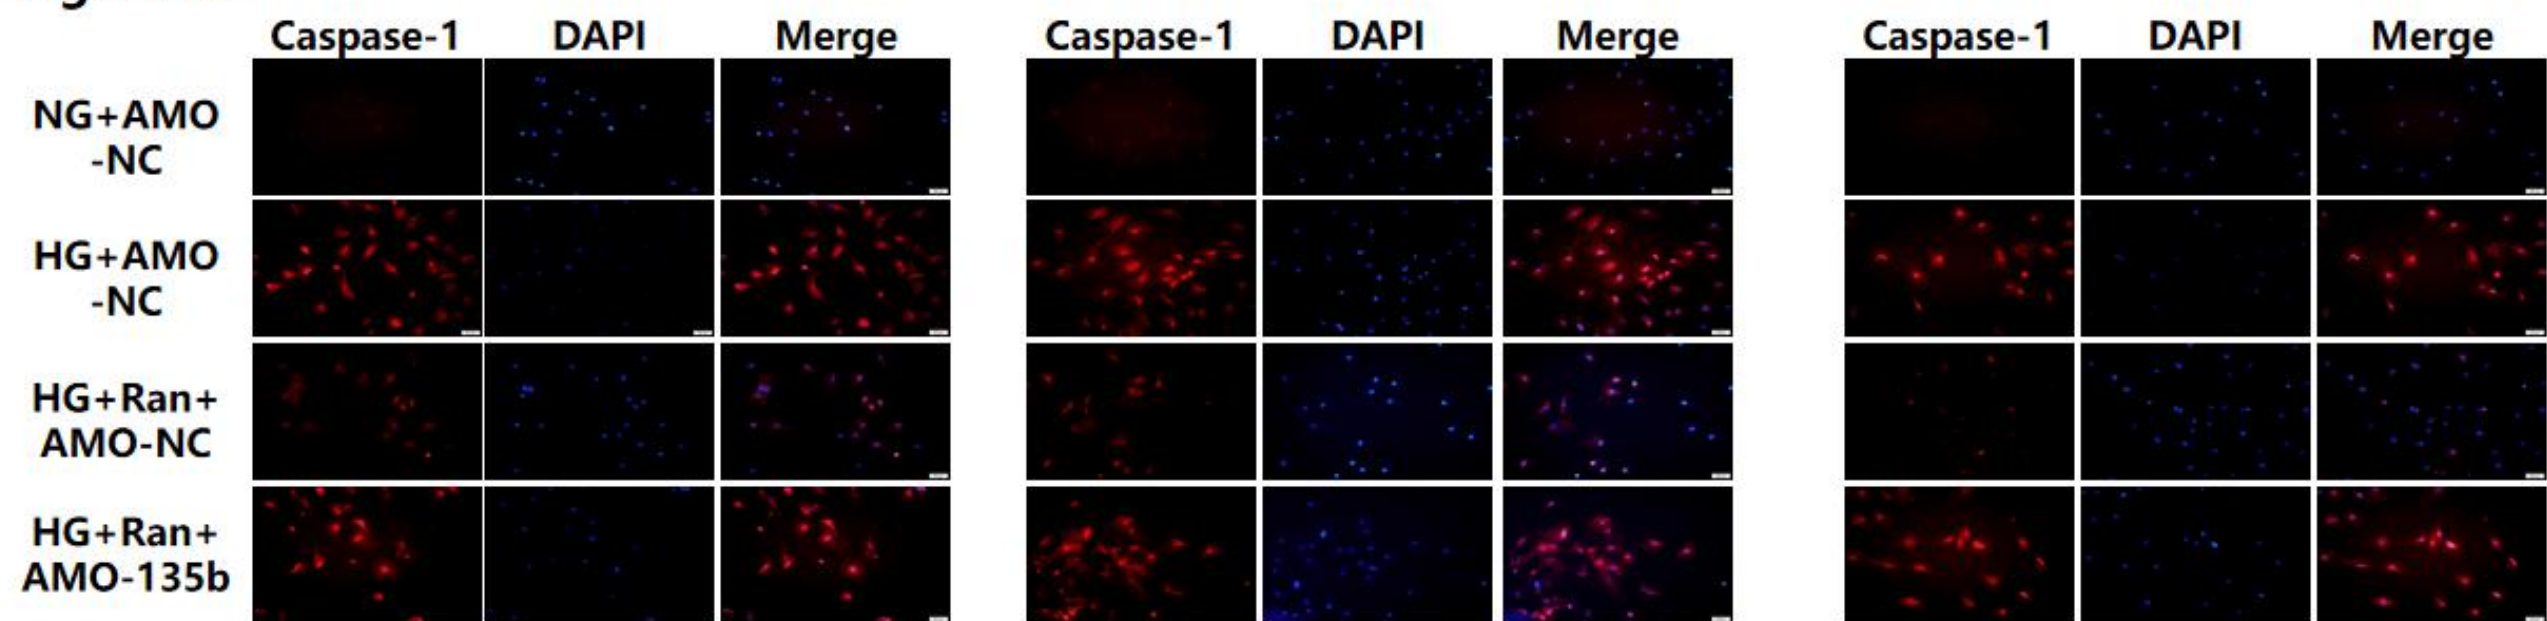



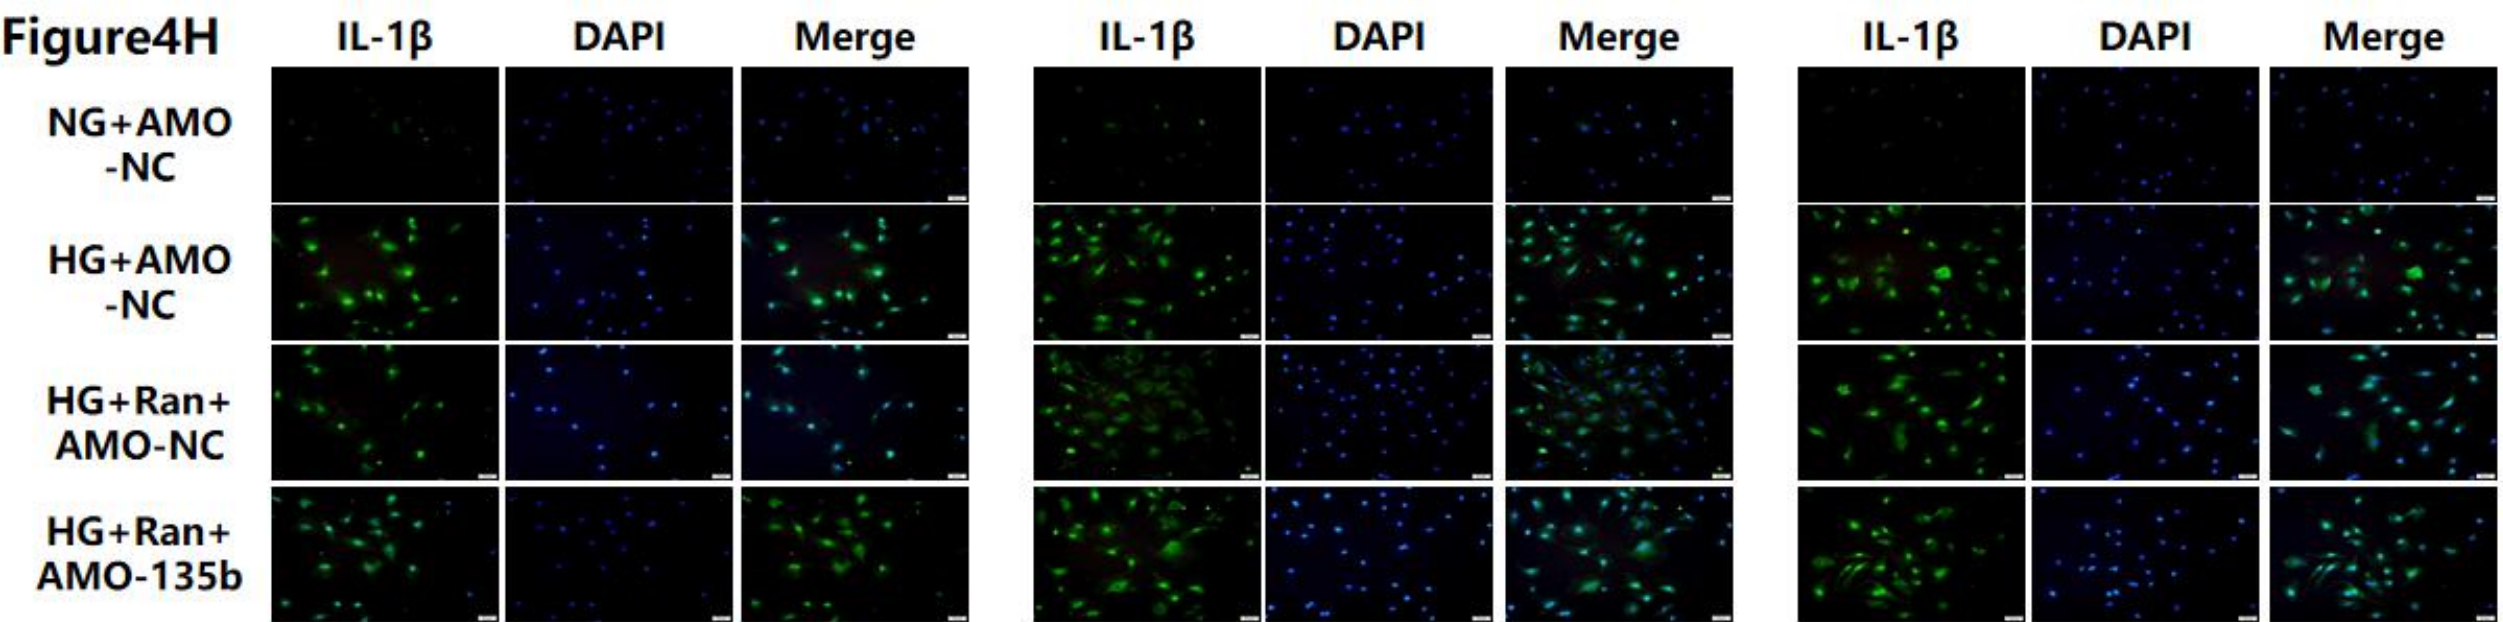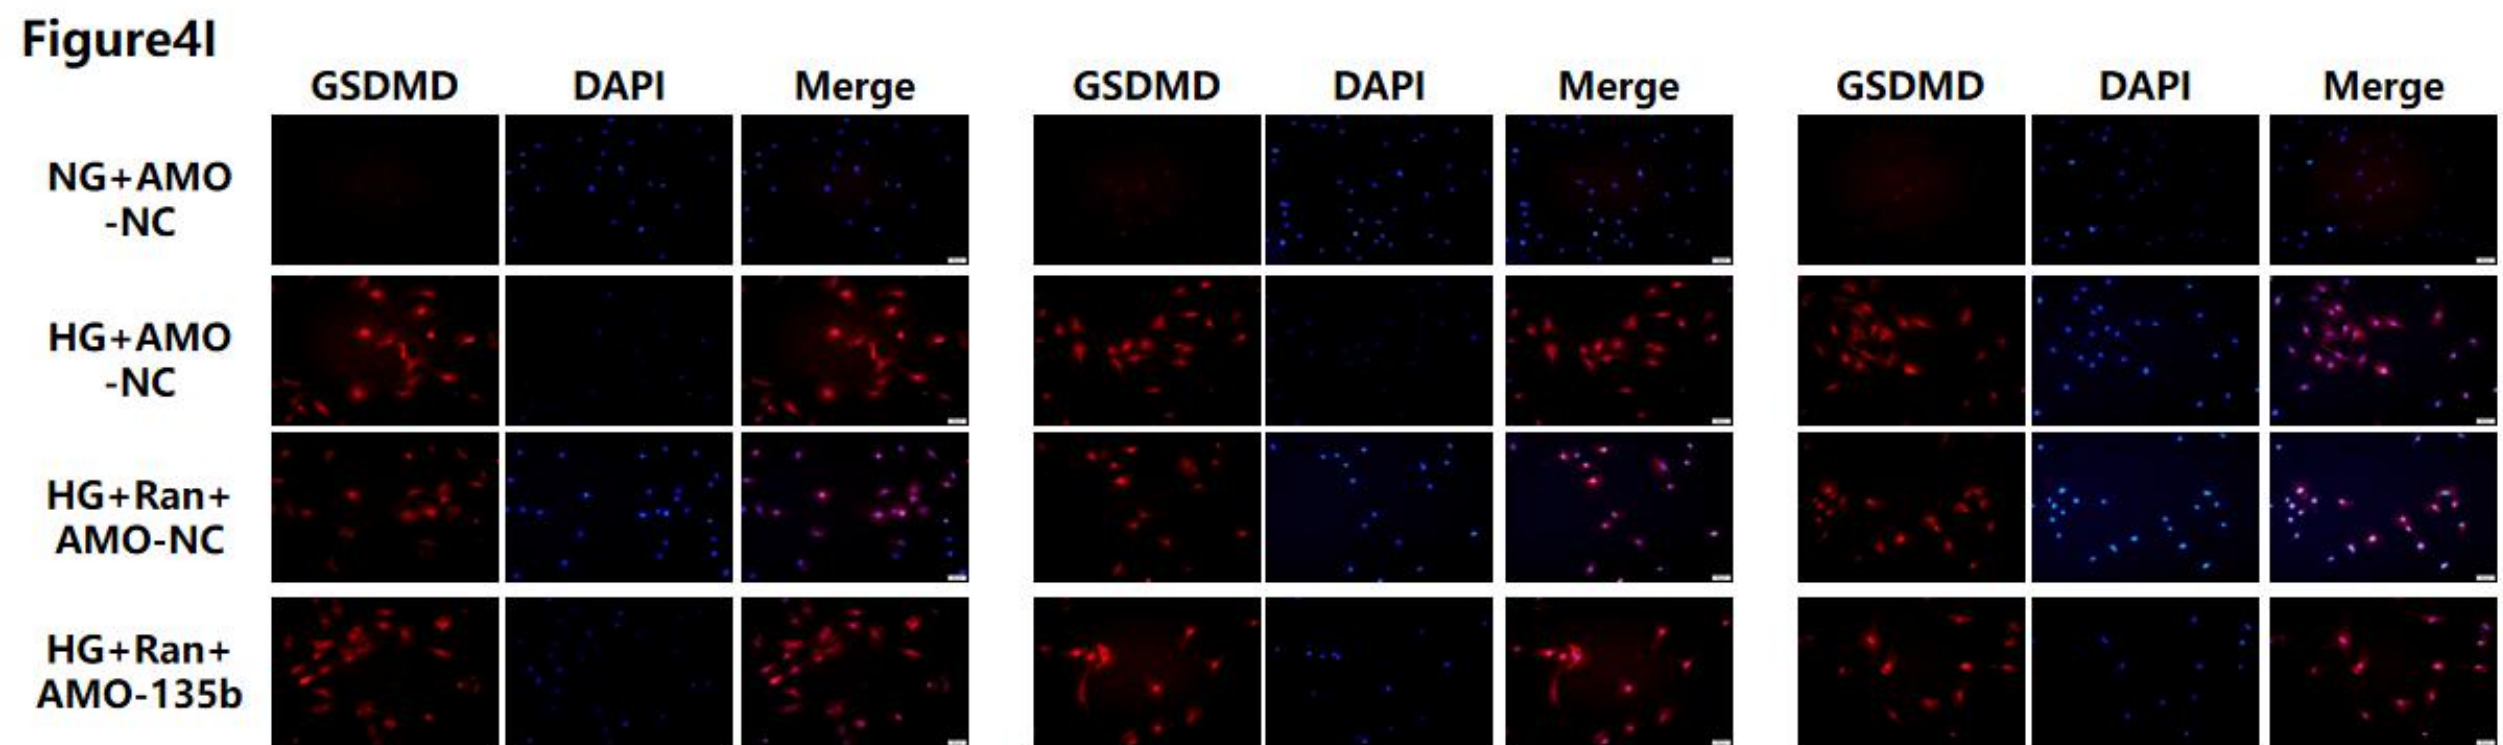

**Figure 5A**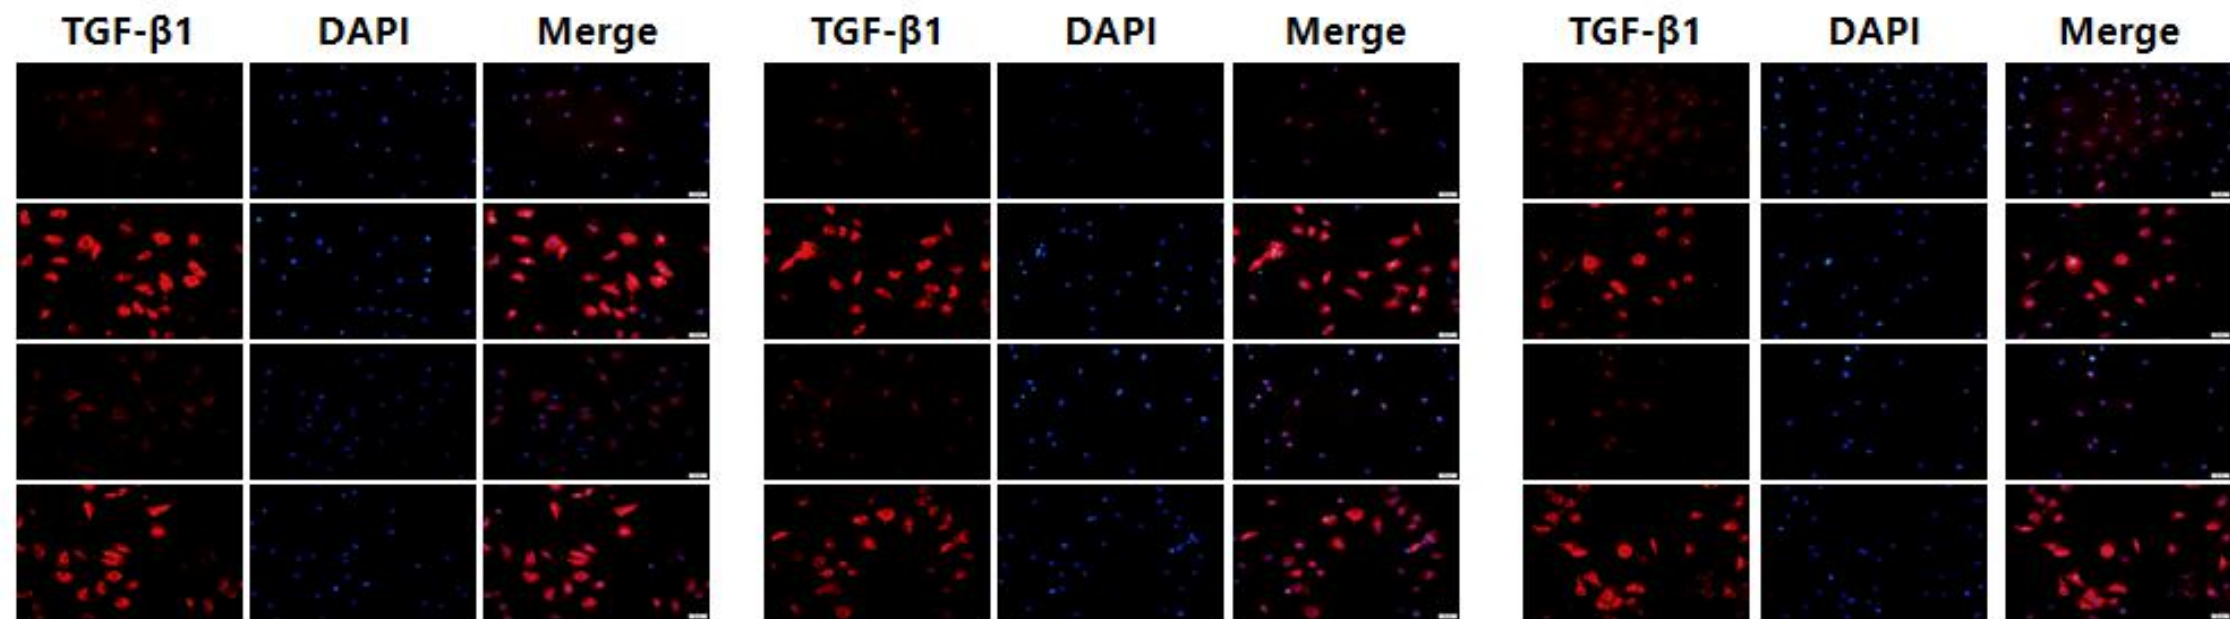**Figure 5B**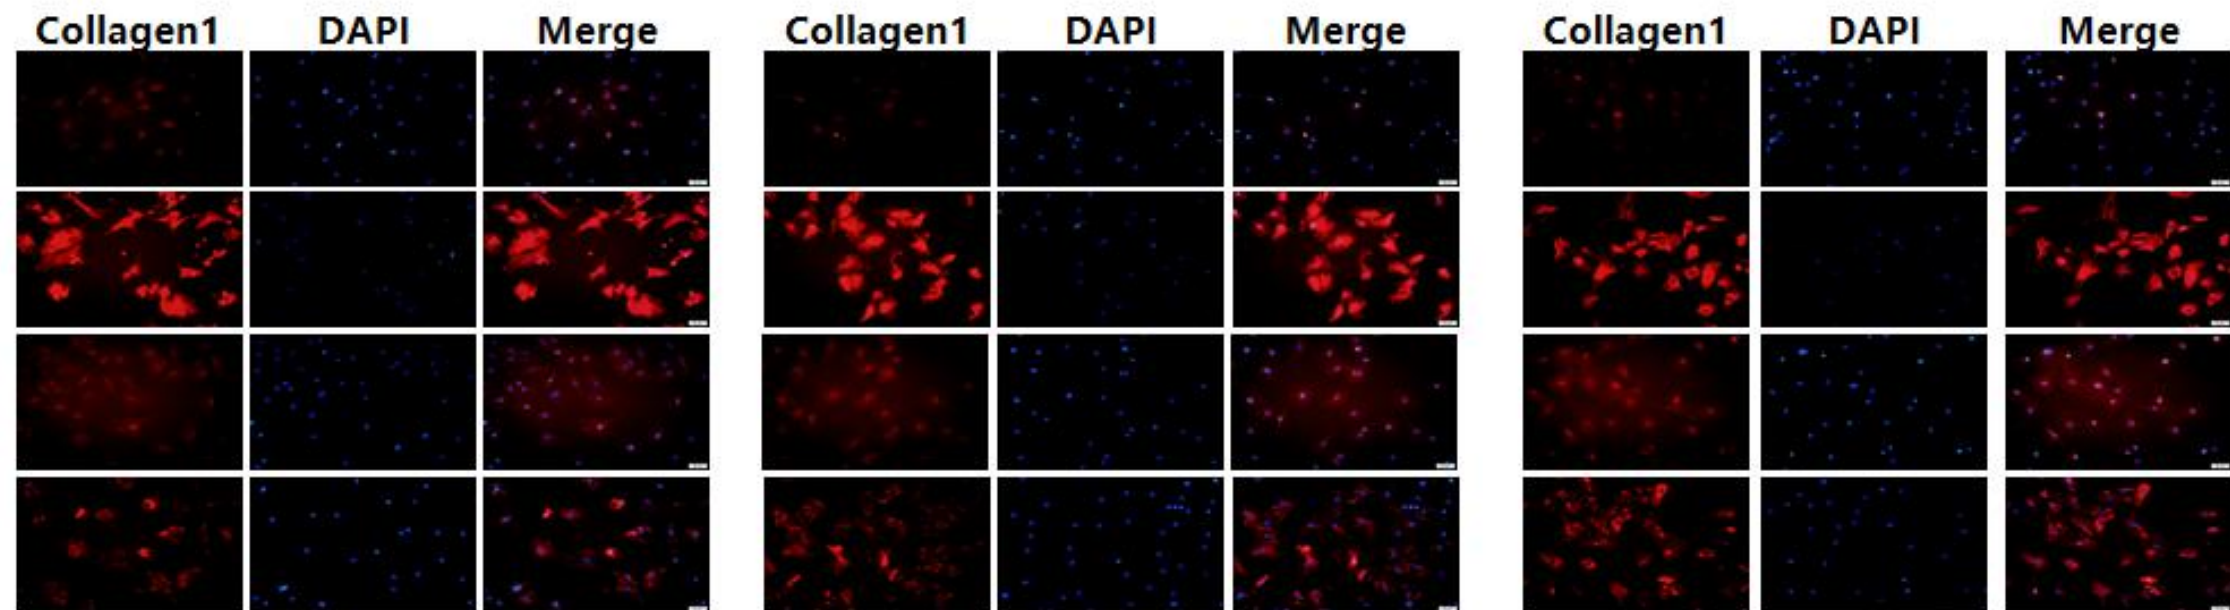



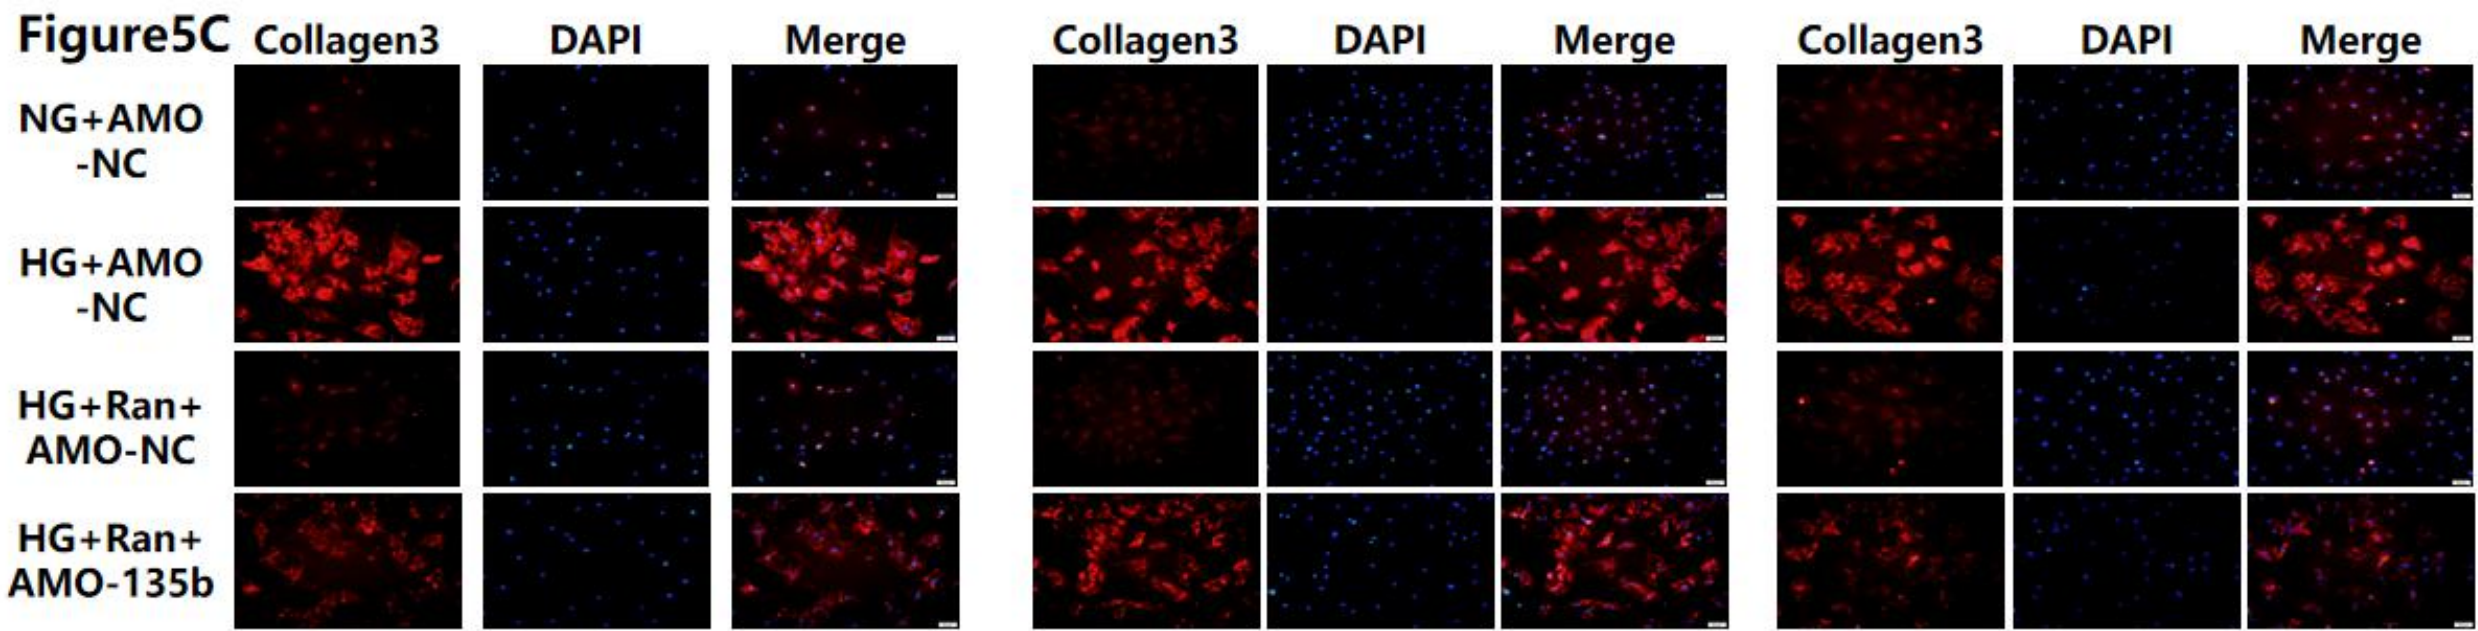

**Figure 5D-F**

|                   | GAPDH | TGF- $\beta$ 1 |
|-------------------|-------|----------------|
| NG+AMO-NC-1       | 17.89 | 29.52          |
| NG+AMO-NC-2       | 17.94 | 29.26          |
| NG+AMO-NC-3       | 16.21 | 27.56          |
| HG+AMO-NC-1       | 15.86 | 26.27          |
| HG+AMO-NC-2       | 17.44 | 27.69          |
| HG+AMO-NC-3       | 15.91 | 26.22          |
| HG+Ran+AMO-NC-1   | 18.21 | 29.08          |
| HG+Ran+AMO-NC-2   | 17.78 | 28.73          |
| HG+Ran+AMO-NC-3   | 15.82 | 26.55          |
| HG+Ran+AMO-135b-1 | 17.75 | 28.34          |
| HG+Ran+AMO-135b-2 | 16.22 | 26.88          |
| HG+Ran+AMO-135b-3 | 16.23 | 26.75          |

|                   | GAPDH | Collagen1 |
|-------------------|-------|-----------|
| NG+AMO-NC-1       | 17.94 | 25.92     |
| NG+AMO-NC-2       | 16.3  | 24.27     |
| NG+AMO-NC-3       | 16.25 | 24.18     |
| HG+AMO-NC-1       | 17.44 | 23.51     |
| HG+AMO-NC-2       | 15.86 | 22.03     |
| HG+AMO-NC-3       | 15.91 | 22.12     |
| HG+Ran+AMO-NC-1   | 18.21 | 25.22     |
| HG+Ran+AMO-NC-2   | 17.78 | 25.2      |
| HG+Ran+AMO-NC-3   | 15.76 | 23.07     |
| HG+Ran+AMO-135b-1 | 17.75 | 24.55     |
| HG+Ran+AMO-135b-2 | 17.79 | 24.7      |
| HG+Ran+AMO-135b-3 | 16.26 | 22.97     |

|                   | GAPDH | Collagen3 |
|-------------------|-------|-----------|
| NG+AMO-NC-1       | 17.9  | 24.25     |
| NG+AMO-NC-2       | 17.89 | 24.34     |
| NG+AMO-NC-3       | 17.94 | 24.17     |
| HG+AMO-NC-1       | 17.44 | 22.61     |
| HG+AMO-NC-2       | 15.86 | 20.91     |
| HG+AMO-NC-3       | 15.91 | 20.94     |
| HG+Ran+AMO-NC-1   | 18.21 | 23.77     |
| HG+Ran+AMO-NC-2   | 15.82 | 21.47     |
| HG+Ran+AMO-NC-3   | 15.76 | 21.59     |
| HG+Ran+AMO-135b-1 | 17.79 | 23.23     |
| HG+Ran+AMO-135b-2 | 16.23 | 21.58     |
| HG+Ran+AMO-135b-3 | 16.26 | 21.66     |



Figure 5G-TGF- $\beta$ 1

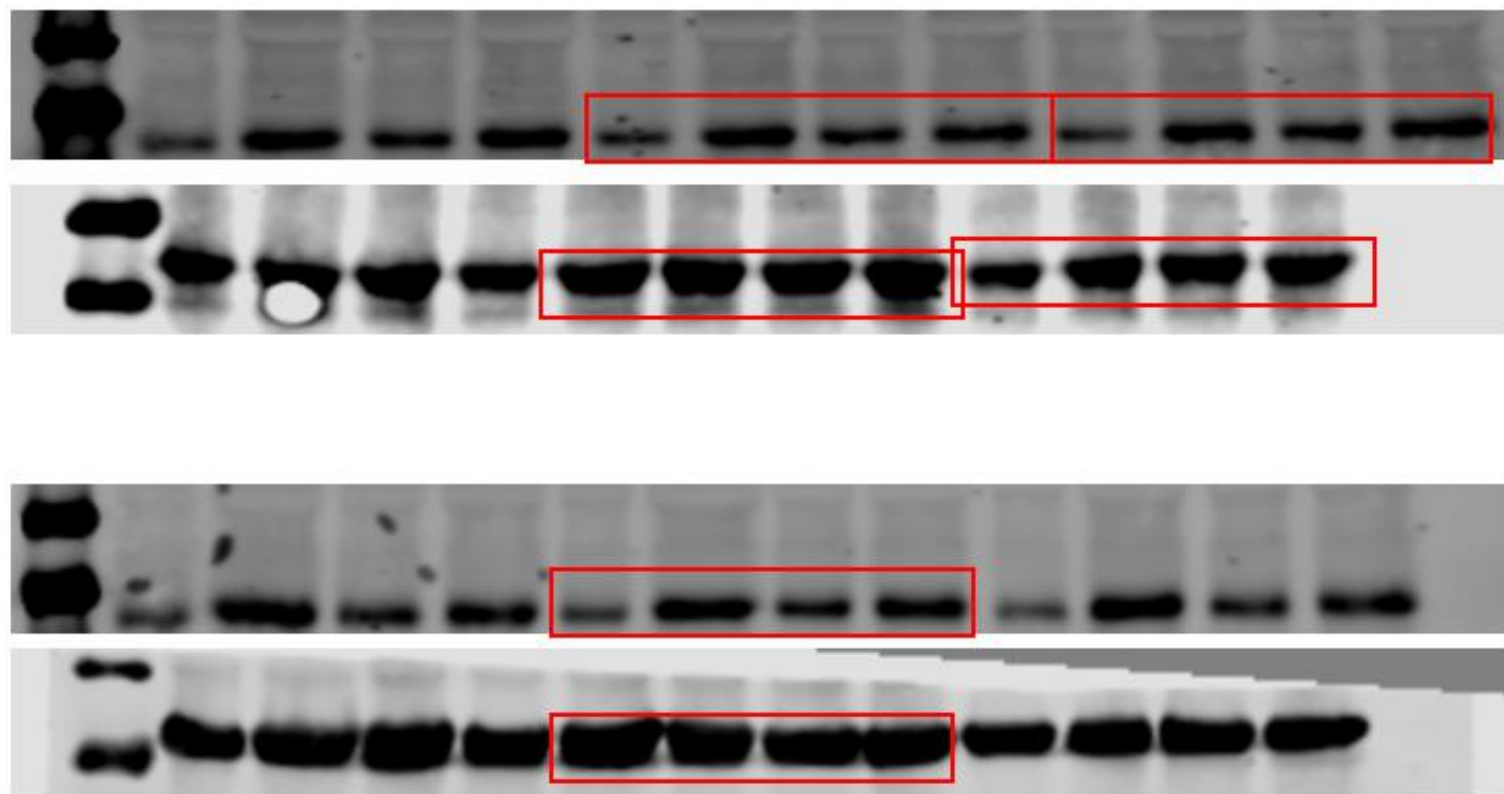

Figure 5H-Collagen1

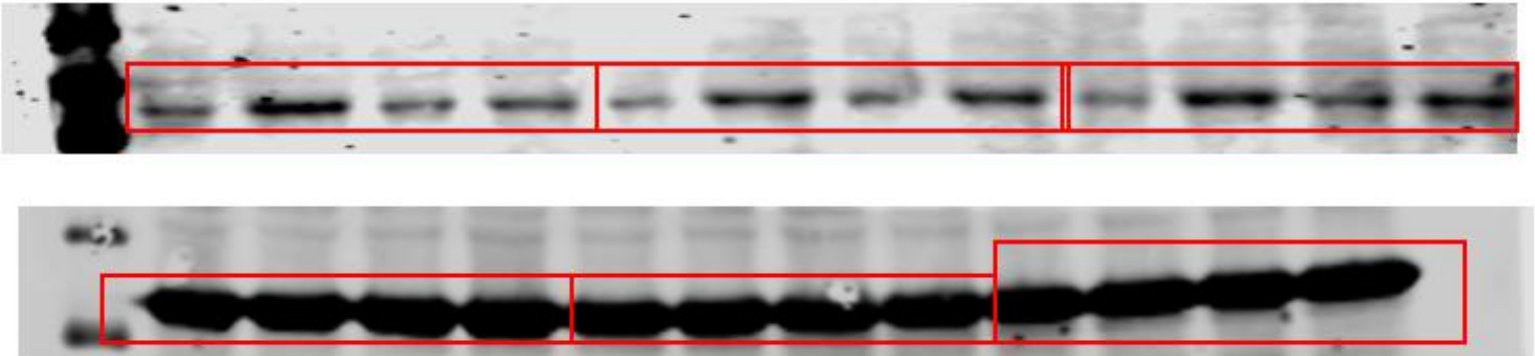

Figure 5I-Collagen3

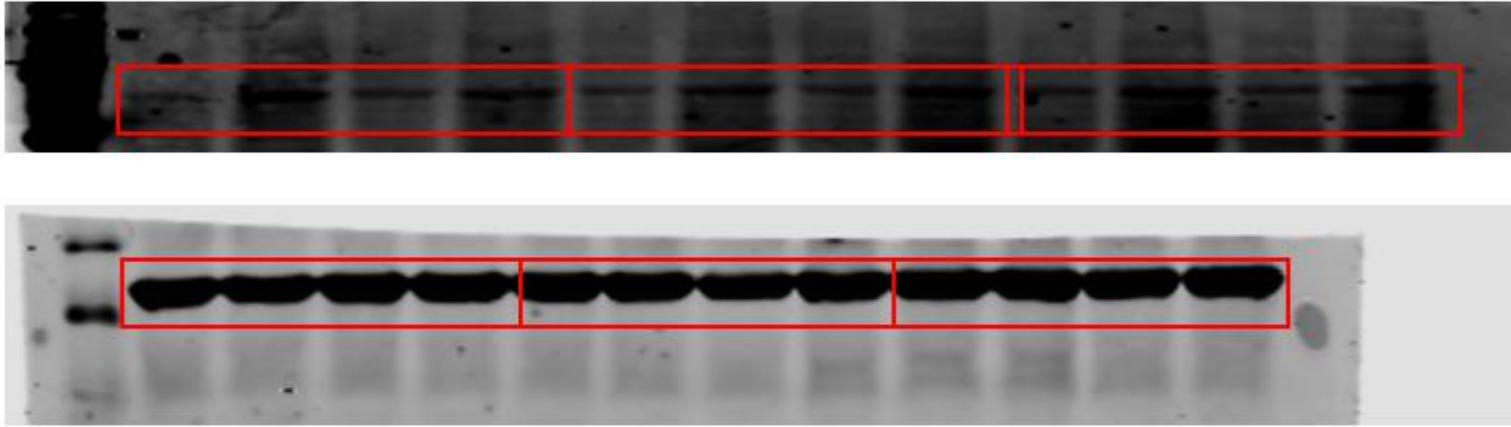

Supplement: Image1.pdf [file Image1.pdf]
